# Supplementary material
Source: PubMed Central journal article supplement (PMC8883746)
Supplement: NIHMS1778751-supplement-SI.pdf [file NIHMS1778751-supplement-SI.pdf]

**Supporting Information for:**

**A drug-like small molecule that targets r(CCUG) repeats in myotonic dystrophy type 2 facilitates degradation by RNA quality control pathways**

Sarah Wagner-Griffin<sup>†</sup>, Masahito Abe<sup>†</sup>, Raphael I. Benhamou, Alicia J. Angelbello, Kamalakannan Vishnu, Jonathan L. Chen, Jessica L. Childs-Disney and Matthew D. Disney<sup>a,\*</sup>

<sup>a</sup> The Scripps Research Institute, Department of Chemistry, 130 Scripps Way, Jupiter, FL 33458, USA

<sup>†</sup> These authors contributed equally.

\*Author to whom correspondence is addressed; Email: [disney@scripps.edu](mailto:disney@scripps.edu)

**Table of Contents:**

- I. Supplementary Tables & Figures
- II. Synthetic Schemes
- III. Compound Characterization

# I. Supplementary Tables & Figures

| <b>Table S1.</b> Approximate IC <sub>50</sub> for the disruption of the r(CCUG) <sup>exp</sup> -MBNL1 complex by various compounds. |                             |                    |                             |                    |                             |
|-------------------------------------------------------------------------------------------------------------------------------------|-----------------------------|--------------------|-----------------------------|--------------------|-----------------------------|
| <b>Compound ID</b>                                                                                                                  | <b>IC<sub>50</sub> (μM)</b> | <b>Compound ID</b> | <b>IC<sub>50</sub> (μM)</b> | <b>Compound ID</b> | <b>IC<sub>50</sub> (μM)</b> |
| 1                                                                                                                                   | 30                          | 29                 | 100                         | 57                 | 105                         |
| 2                                                                                                                                   | 35                          | 30                 | 105                         | 58                 | 15                          |
| 3                                                                                                                                   | 40                          | 31                 | 105                         | 59                 | 60                          |
| 4                                                                                                                                   | 40                          | 32                 | 110                         | 60                 | 200                         |
| 5                                                                                                                                   | 45                          | 33                 | 135                         | 61                 | 200                         |
| 6                                                                                                                                   | 50                          | 34                 | 135                         | 62                 | 10                          |
| 7                                                                                                                                   | 50                          | 35                 | 150                         | 63                 | 2                           |
| 8                                                                                                                                   | 50                          | 36                 | 155                         | 64                 | 30                          |
| 9                                                                                                                                   | 60                          | 37                 | 165                         | 65                 | 200                         |
| 10                                                                                                                                  | 60                          | 38                 | 190                         | 66                 | 200                         |
| 11                                                                                                                                  | 65                          | 39                 | 200                         | 67                 | 200                         |
| 12                                                                                                                                  | 70                          | 40                 | 200                         | 68                 | 20                          |
| 13                                                                                                                                  | 70                          | 41                 | 200                         | 69                 | 200                         |
| 14                                                                                                                                  | 70                          | 42                 | 200                         | 70                 | 200                         |
| 15                                                                                                                                  | 70                          | 43                 | 200                         | 71                 | 0.4                         |
| 16                                                                                                                                  | 70                          | 44                 | 200                         | 72                 | 0.2                         |
| 17                                                                                                                                  | 75                          | 45                 | 200                         | 73                 | 0.3                         |
| 18                                                                                                                                  | 75                          | 46                 | 170                         | 74                 | 0.3                         |
| 19                                                                                                                                  | 80                          | 47                 | 135                         | 75                 | 105                         |
| 20                                                                                                                                  | 80                          | 48                 | 70                          | 76                 | 110                         |
| 21                                                                                                                                  | 80                          | 49                 | 10                          | 77                 | 20                          |
| 22                                                                                                                                  | 85                          | 50                 | 7                           | 78                 | 1                           |
| 23                                                                                                                                  | 85                          | 51                 | 30                          | 79                 | 4                           |
| 24                                                                                                                                  | 90                          | 52                 | 200                         | 80                 | 10                          |
| 25                                                                                                                                  | 95                          | 53                 | 200                         | 81                 | 10                          |
| 26                                                                                                                                  | 95                          | 54                 | 90                          | 82                 | 1                           |
| 27                                                                                                                                  | 100                         | 55                 | 200                         |                    |                             |
| 28                                                                                                                                  | 100                         | 56                 | 200                         |                    |                             |

| <b>Table S2.</b> Sequences of primers used for RT-PCR and RT-qPCR |                         |                        |         |
|-------------------------------------------------------------------|-------------------------|------------------------|---------|
| Gene                                                              | Forward Primer (5'-3')  | Reverse Primer (5'-3') | Purpose |
| <i>MAP4K4</i><br>Exon 22a                                         | CCTCATCCAGTGAGGAGTCG    | TGGTGGGAGAAATGCTGTATGC | RT-PCR  |
| <i>IR</i> Exon 11                                                 | CCAAAGACAGACTCTCAGAT    | AACATCGCCAAGGGACCTGC   | RT-PCR  |
| <i>GAPDH</i>                                                      | AAGGTGAAGGTCGGAGTCAA    | AATGAAGGGGTCATTGATGG   | qPCR    |
| <i>CNBP</i> intron 1                                              | ATTCCAAGGTTGGTTGAAGC    | AACCCAAACCAATGAAGCTG   | qPCR    |
| <i>CNBP</i> mature mRNA                                           | AAACTGGTCATGTAGCCATCAAC | AATTGTGCATTCCCGTGCAAG  | qPCR    |

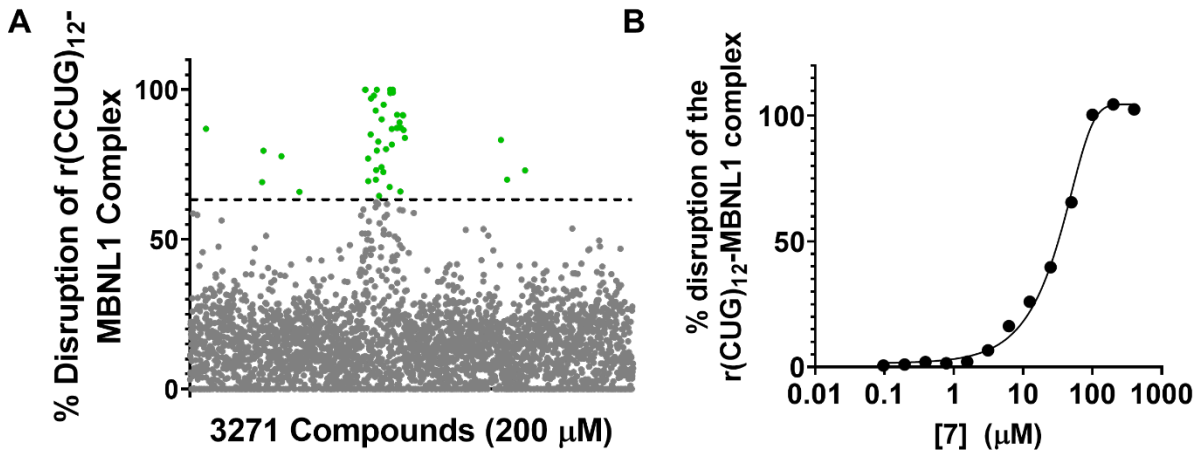

**Figure S1. Results of a high throughput screen to identify small molecules that disrupt the r(CCUG)<sub>12</sub>-MBNL1 complex, a validated *in vitro* model<sup>1</sup> of the disease-causing interaction that causes DM2.** (A) All 3,271 compounds in the library were screened at 200 μM. Compounds that exhibited a percent disruption >3 standard deviations from the mean (3σ; >60% disruption) are highlighted in green. (B) Representative curve of the disruption of r(CCUG)<sub>12</sub>-MBNL1 complex by compound 7.

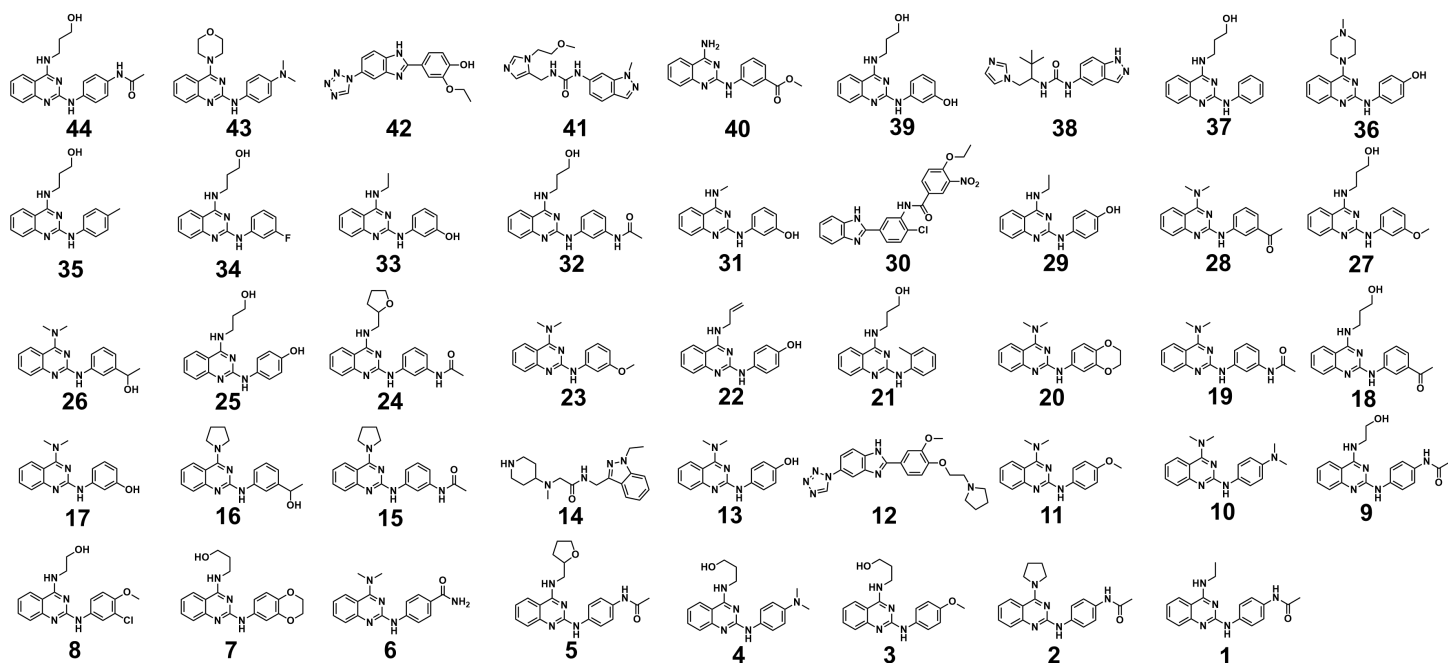

**Figure S2. Structures of compounds 1 – 44.** Structures of hit compounds from the high throughput screen of the RNA-focused library that disrupt r(CCUG)<sub>12</sub>-MBNL1 complex greater than 60%.

A. 1D  $^1\text{H}$  NMR of **3**

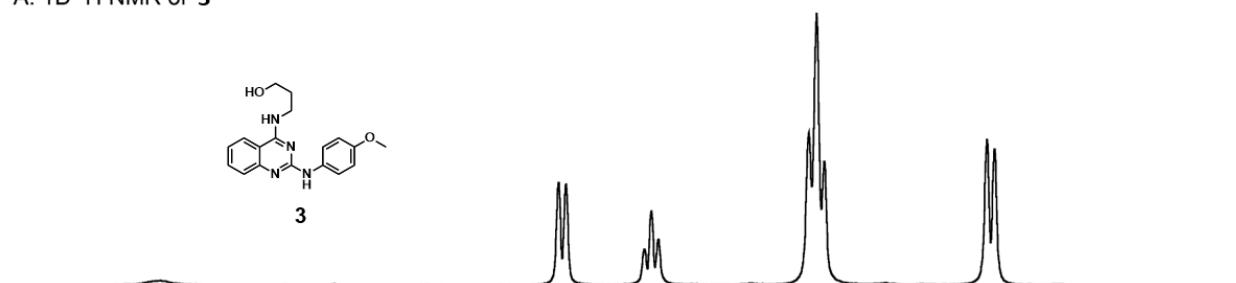

B. WaterLOGSY NMR spectra of **3**

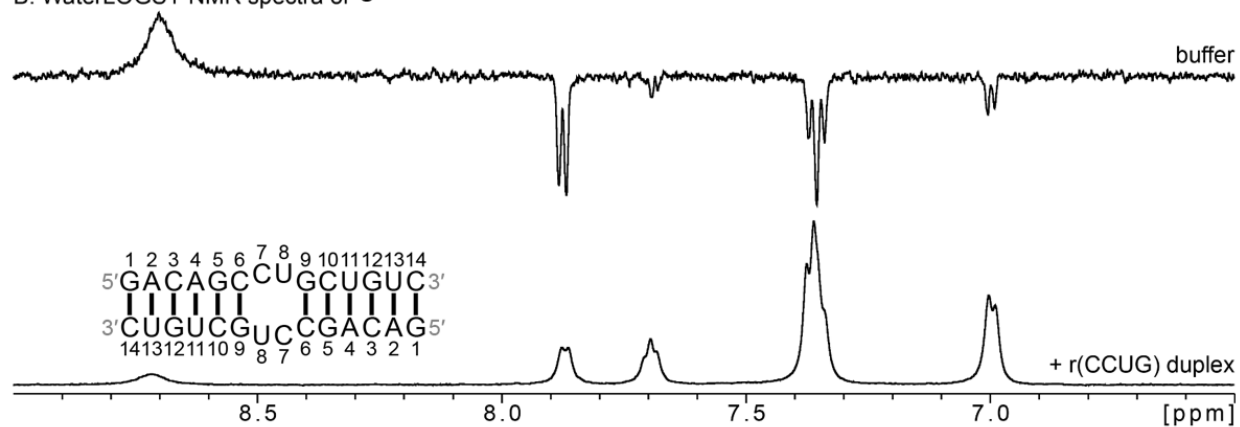

**Figure S3. WaterLOGSY NMR analysis of **3** with r(GACAGCCUGCUGUC)<sub>2</sub> duplex.** (A) 1D  $^1\text{H}$  NMR of **3**. (B) WaterLOGSY NMR spectra of **3**.

A. 1D  $^1\text{H}$  NMR of **4**

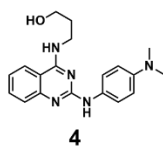

B. WaterLOGSY NMR spectra of **4**

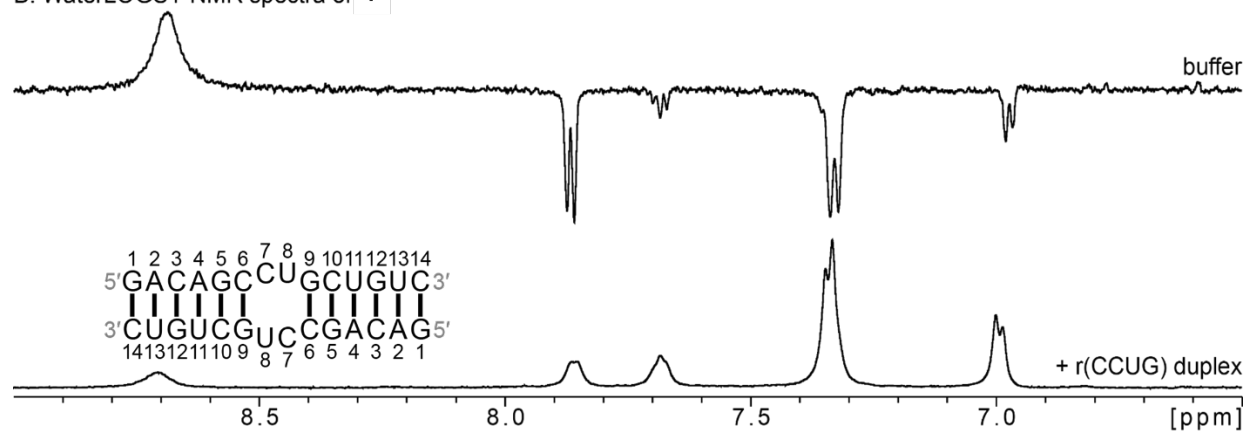

**Figure S4. WaterLOGSY NMR analysis of **4** with r(GACAGCCUGCUGUC)<sub>2</sub> duplex.** (A) 1D  $^1\text{H}$  NMR of **4**. (B) WaterLOGSY NMR spectra of **4**.

A. 1D  $^1\text{H}$  NMR of **5**

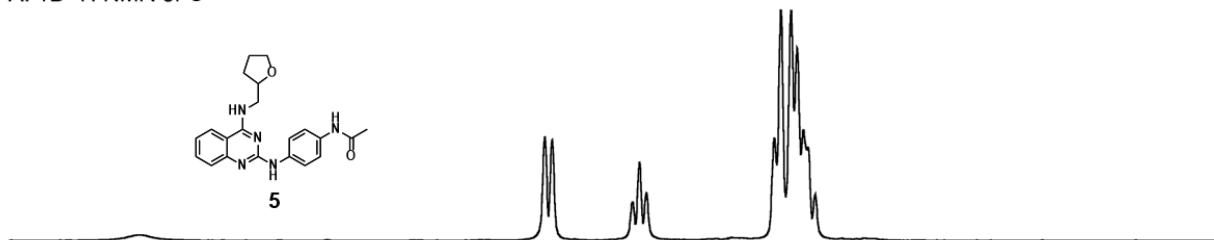

B. WaterLOGSY NMR spectra of **5**

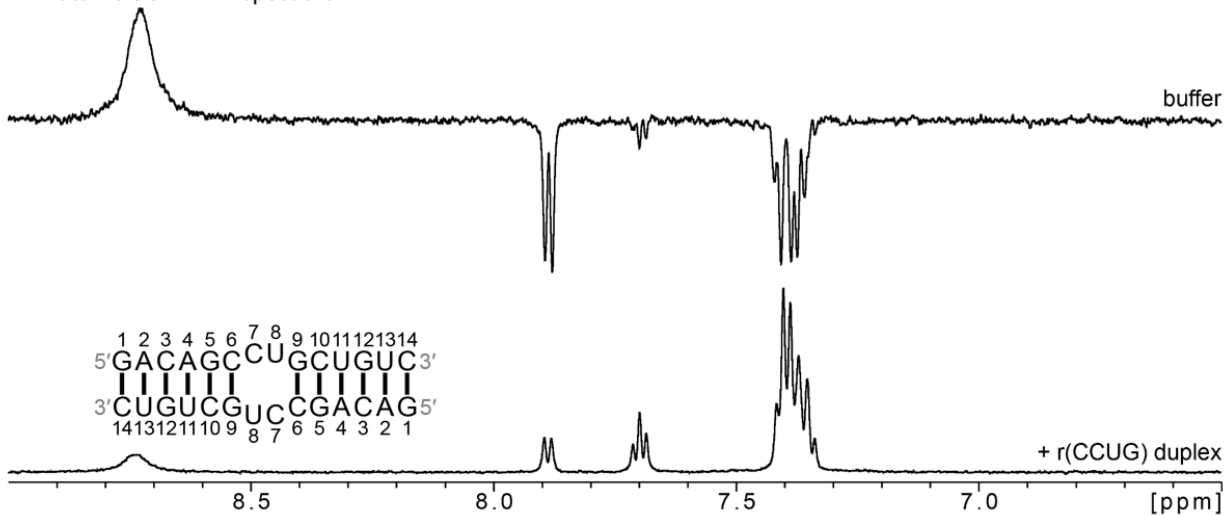

**Figure S5. WaterLOGSY NMR analysis of **5** with  $r(\text{GACAGCCUGCUGUC})_2$  duplex.** (A) 1D

$^1\text{H}$  NMR of **5**. (B) WaterLOGSY NMR spectra of **5**.

A. 1D  $^1\text{H}$  NMR of **7**

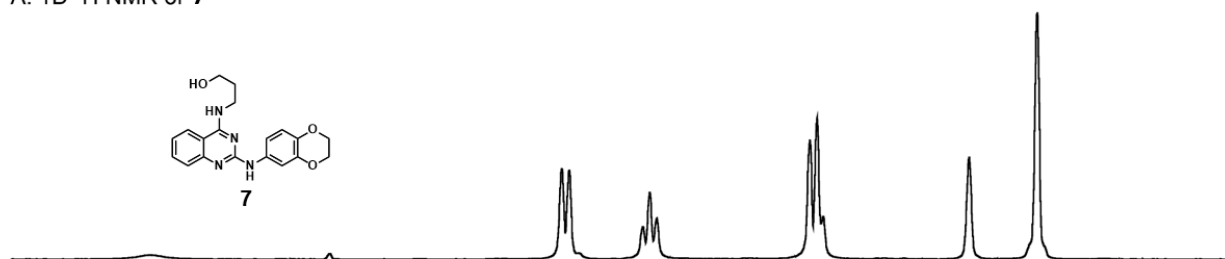

B. WaterLOGSY NMR spectra of **7**

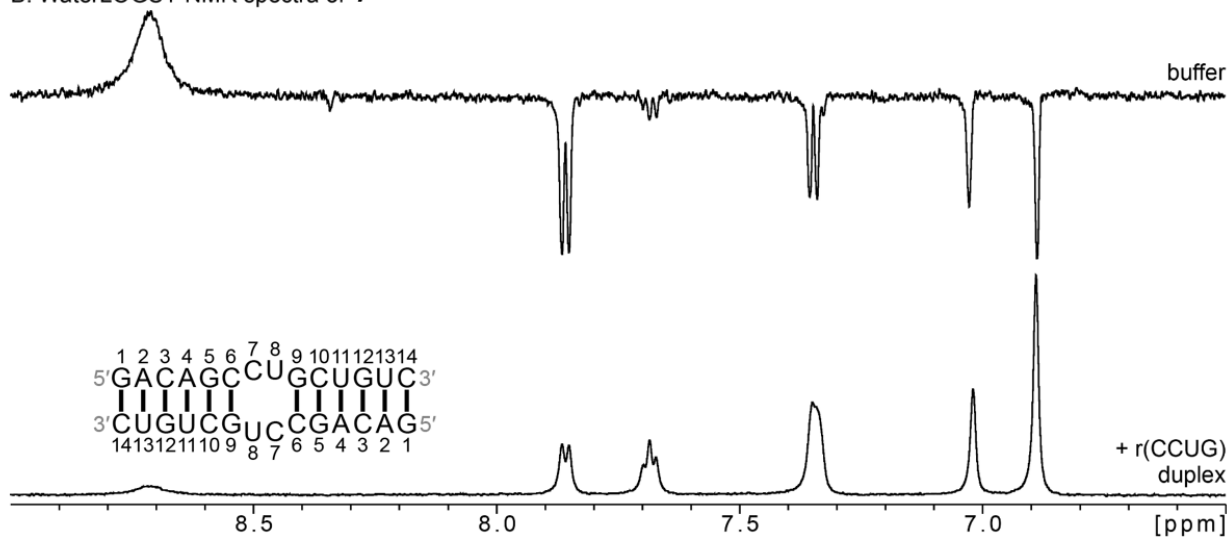

**Figure S6. WaterLOGSY NMR analysis of **7** with  $r(\text{GACAG}\underline{\text{CCUG}}\text{CUGUC})_2$  duplex.** (A) 1D  $^1\text{H}$  NMR of **7**. (B) WaterLOGSY NMR spectra of **7**.

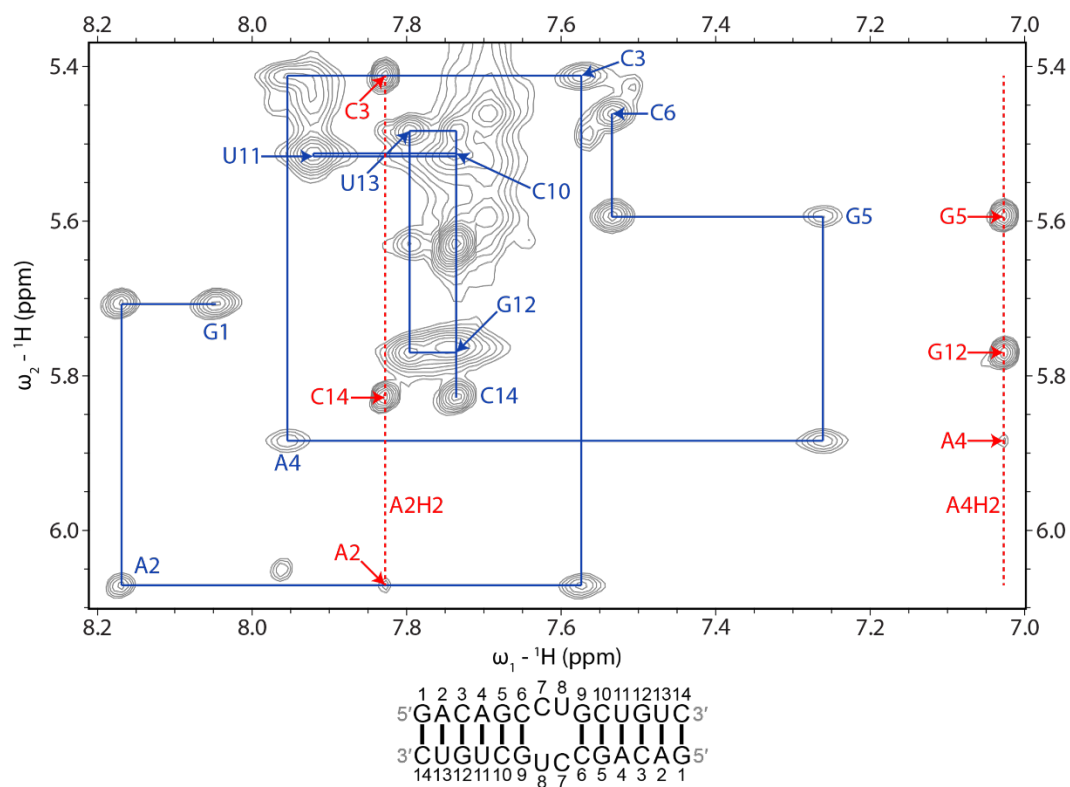

**Figure S7.** 2D NOESY NMR analysis of r(GACAGCCUGCUGUC)<sub>2</sub> duplex in the absence of compound.

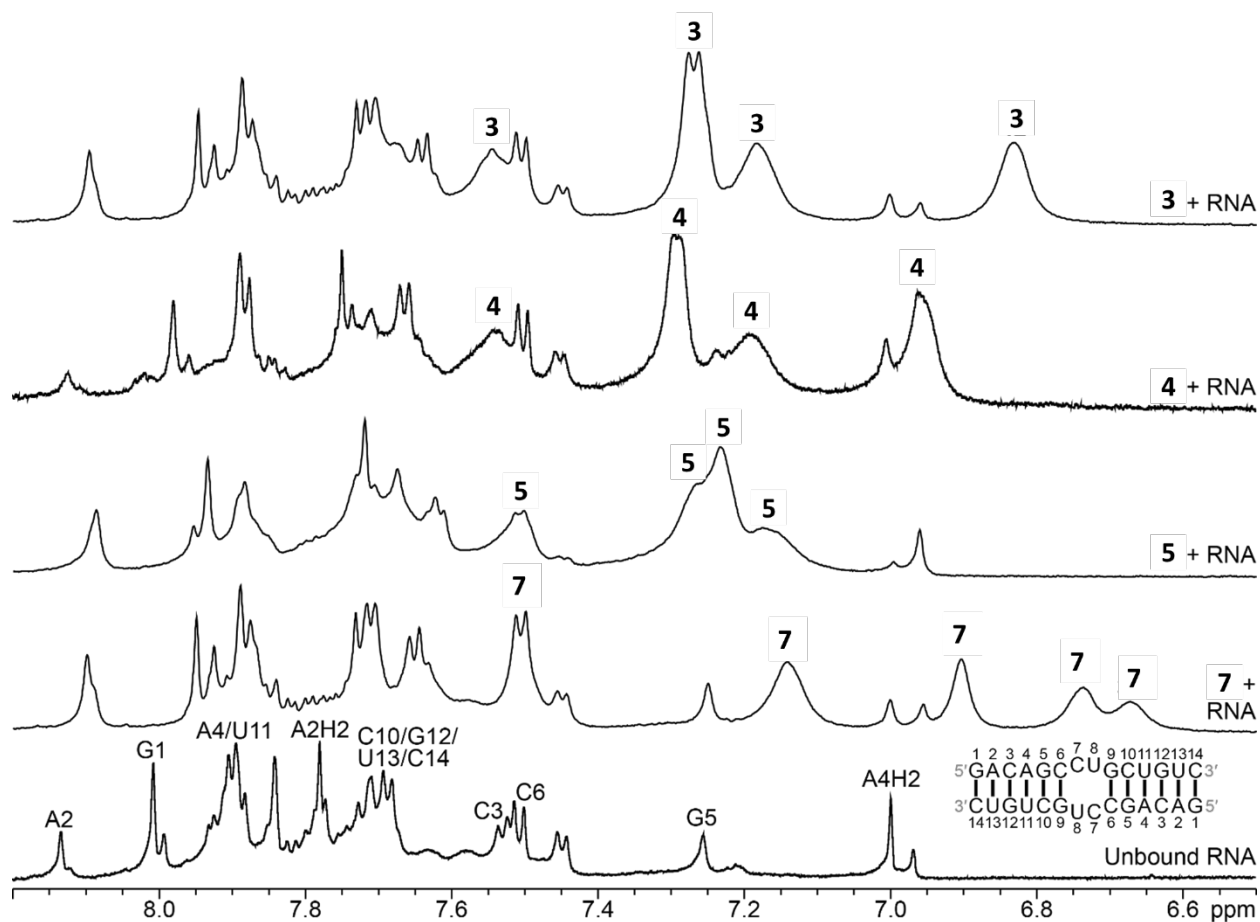

**Figure S8.** 1D NMR analysis of compounds bound to r(GACAGCCUGCUGUC)<sub>2</sub>. 1D spectra of unbound RNA (bottom) and shifts in spectra upon addition of compound.

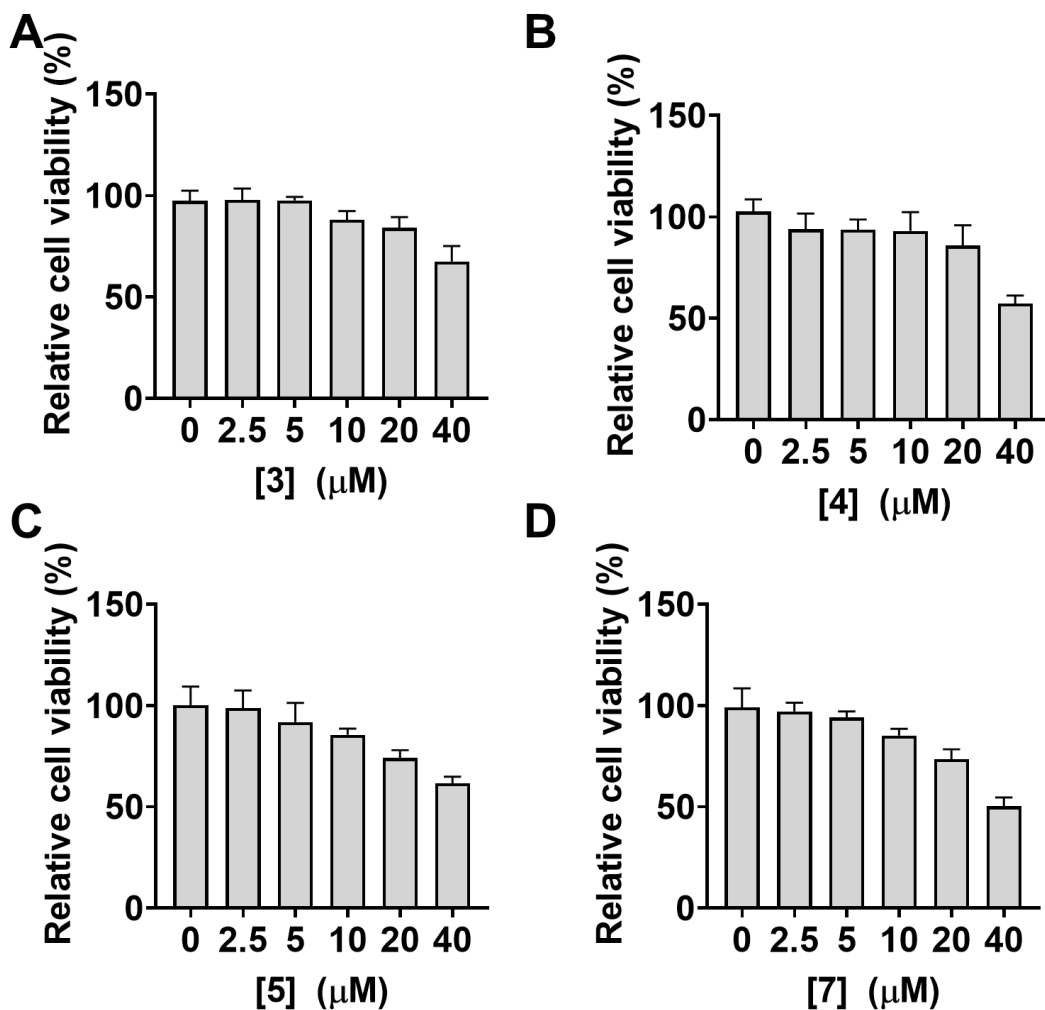

**Figure S9.** Cell viability of DM2 fibroblasts treated with 3, 4, 5, and 7, as assessed via **CellTiter-Glo**. Viability of cells treated with 3 (A), 4 (B), 5 (C), and 7 (D). For all panels,  $n = 5$  and error bars represent SD.

<45 - 53; Aniline replacement>

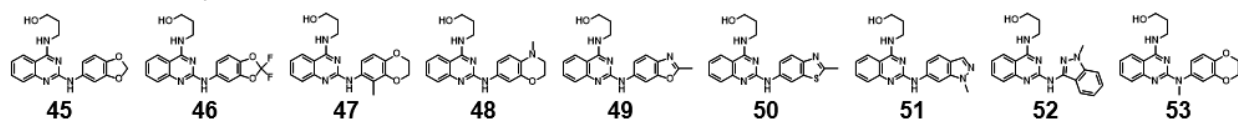

<54 – 61; Quinazoline replacement>

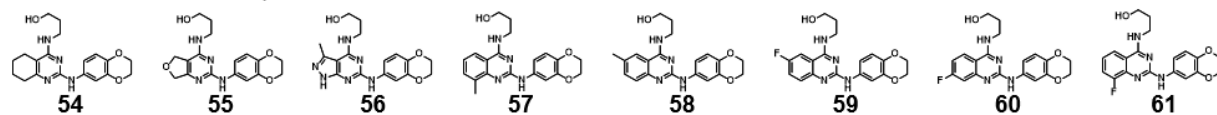

<62 – 64; Combination of potent scaffolds>

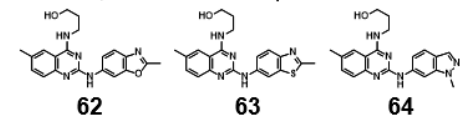

<65 – 70; Benzothiazole functionalization by aryl group>

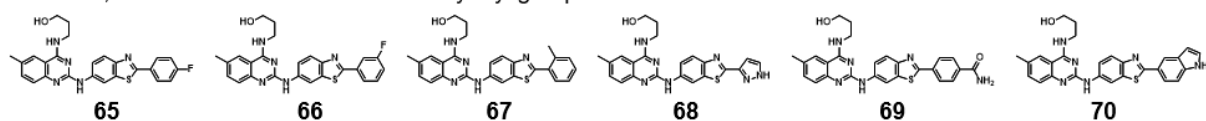

<71 – 82; Benzothiazole functionalization by amine >

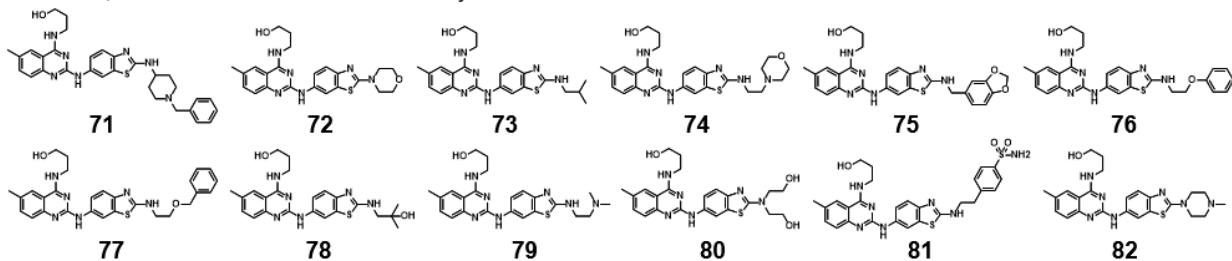

Figure S10. Structures of compounds 45 – 82.

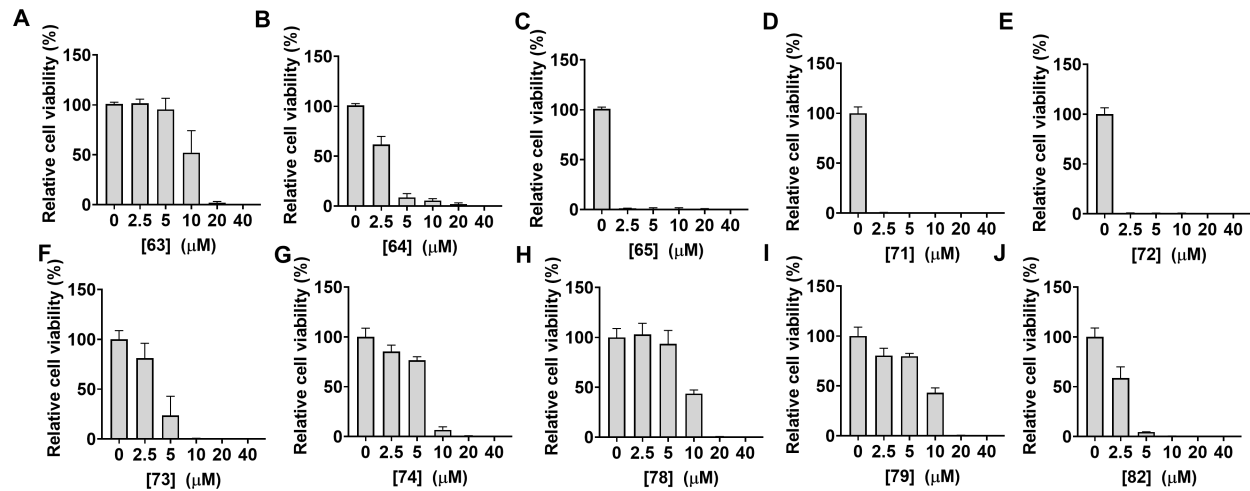

**Figure S11. Cell viability of DM2 fibroblasts treated with lead optimized compounds, as assessed via Cell-Titer Glo.** Viability of cells treated with **63** (A), **64** (B), **65** (C), **71** (D), **72** (E), **73** (F), **74** (G), **78** (H), **79** (I), and **82** (J). For all panels,  $n = 5$  and error bars represent SD.

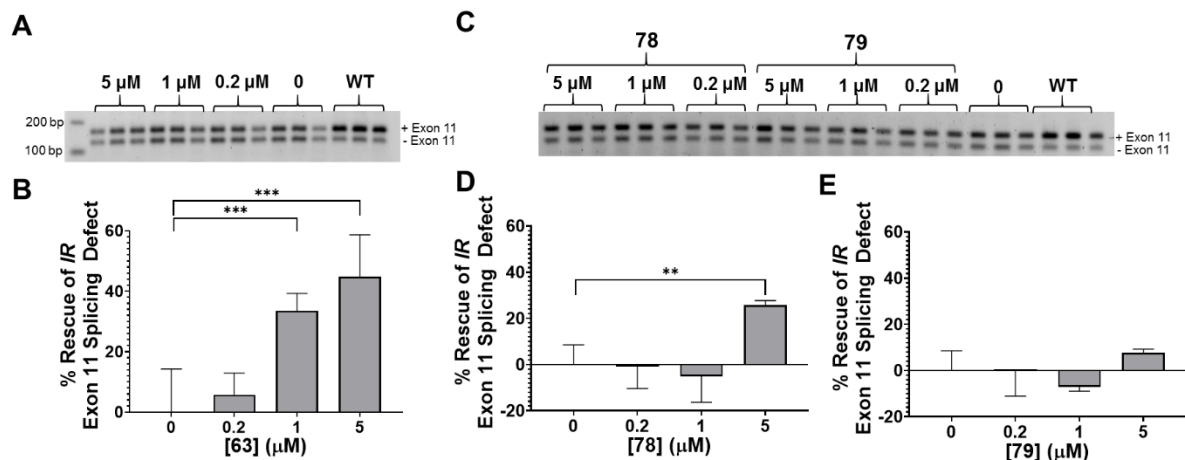

**Figure S12. Cellular activity of compounds 63, 78, and 79 in DM2 fibroblasts, as assessed by rescue of *IR* exon 11 mis-splicing.** (A) Representative gel image of *IR* exon 11 splicing in DM2 fibroblasts treated with **63**. (B) Quantification of rescue of *IR* exon 11 splicing. (C) Representative gel image of *IR* exon 11 splicing in DM2 fibroblasts treated with **78** or **79**. (D) Quantification of rescue of *IR* exon 11 splicing in DM2 fibroblasts treated with **78**. (E) Quantification of rescue of *IR* exon 11 splicing in DM2 fibroblasts treated with **79**. For all panels,  $n = 3$  and error bars represent SD; \*\*  $P < 0.01$ , \*\*\*  $P < 0.001$ , as determined by one-way ANOVA relative to untreated.

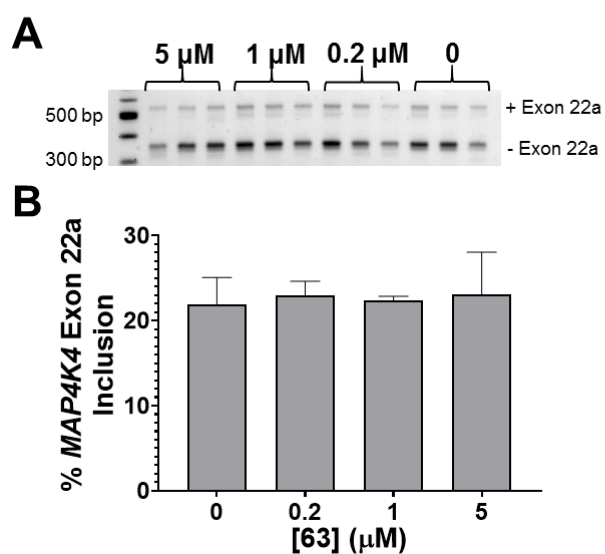

**Figure S13. Compound 63 does not affect *MAP4K4* (non-MBNL1 regulated) splicing in DM2 fibroblasts.** (A) Representative gel image of *MAP4K4* exon 22a splicing in DM2 fibroblasts treated with **63**. (B) Quantification of *MAP4K4* exon 22a inclusion; n = 3; error bars represent SD.

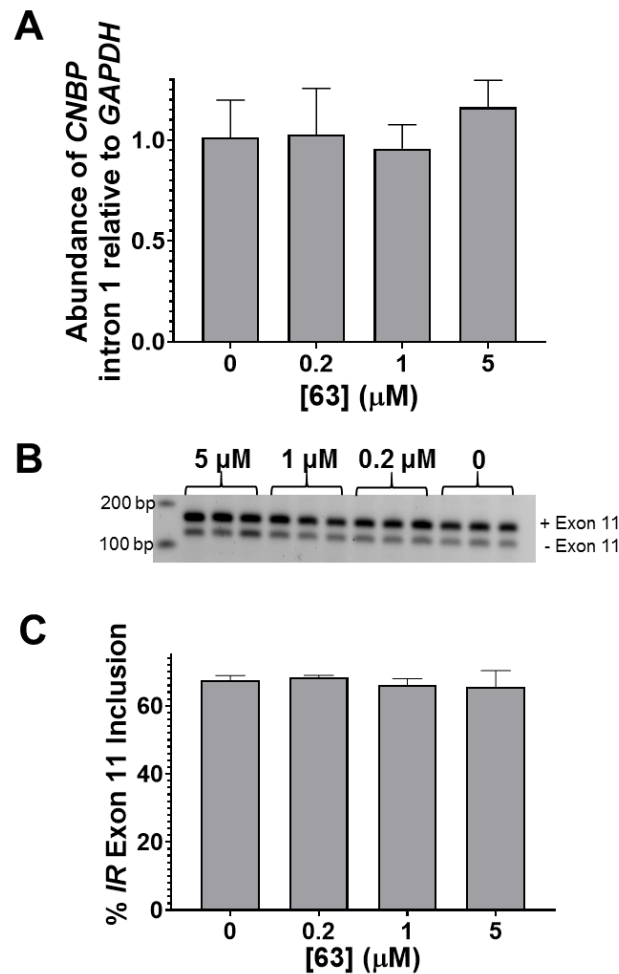

**Figure S14. Compound 63 has no effect on *CNBP* levels or *IR* exon 11 splicing in wild-type fibroblasts.** (A) Analysis of *CNBP* intron 1 levels in wild-type fibroblasts treated with **63** via RT-qPCR. (B) Representative gel image of *IR* exon 11 splicing in wild-type fibroblasts treated with **63**. (C) Quantification of *IR* exon 11 inclusion. For all panels:  $n = 3$  and error bars represent SD.

## II. Synthetic Schemes

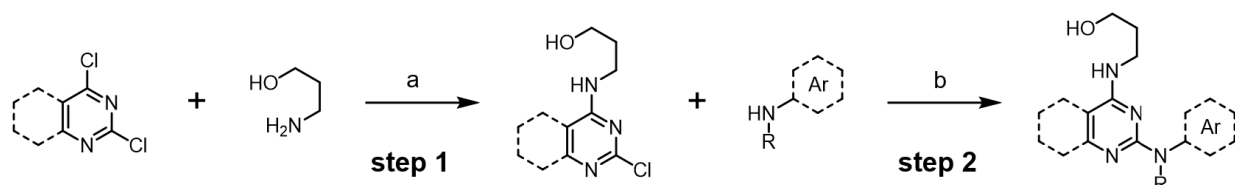

**Scheme S1. General synthetic procedure 1 for synthesis of compounds 7, 45 – 64 and intermediate D.** Reagents and conditions; (a) 3-aminopropanol, IPA, 85 °C, 30 min, MW irradiation, (b) aniline, EtOH, 150 °C, 30-60 min, MW irradiation.

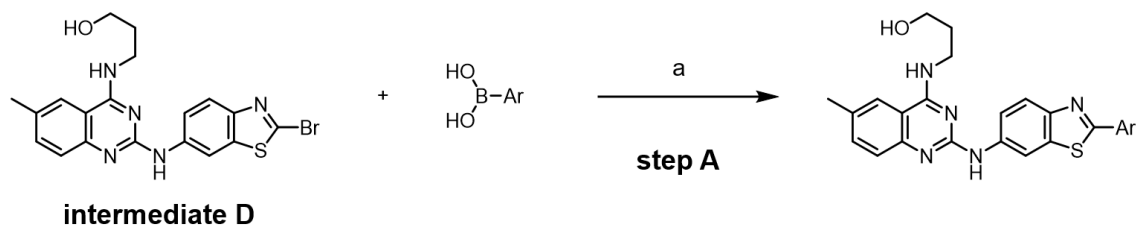

**Scheme S2. General synthetic procedure 2 for synthesis of compounds 65 – 70.** Reagents and conditions; (a) Ar-boronic acid, Pd(PPh<sub>3</sub>)<sub>4</sub>, K<sub>3</sub>PO<sub>4</sub>, dioxane/H<sub>2</sub>O (2/1), 120 °C, overnight

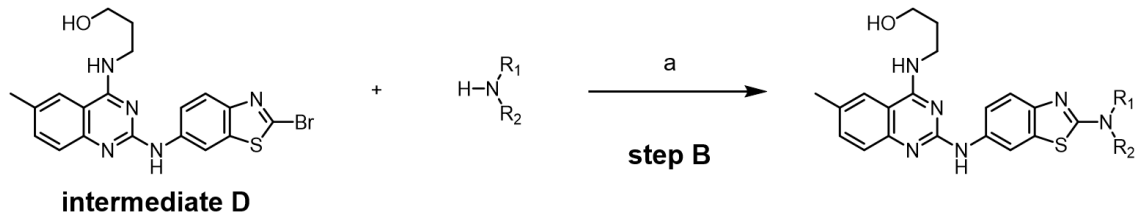

**Scheme S3. General synthetic procedure 3 for synthesis of compounds 71 – 82.** Reagents and conditions; (a) amine, DIPEA, 3-pentanol, 120 °C, overnight.

### III. Compound Characterization

#### Characterization of 7:

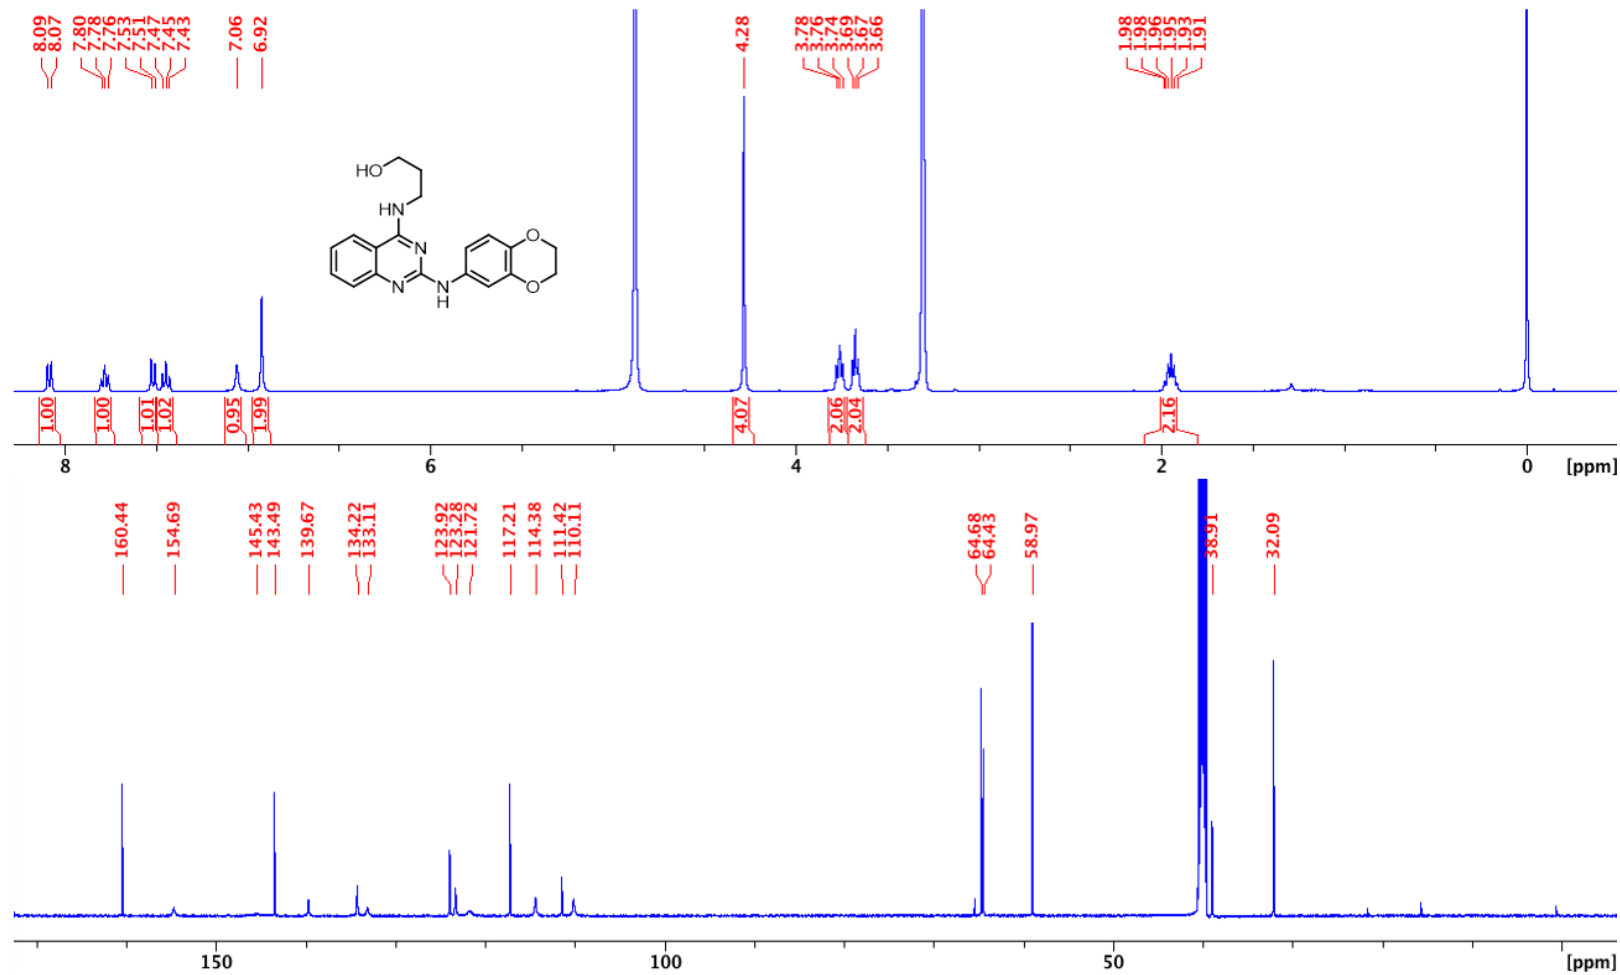

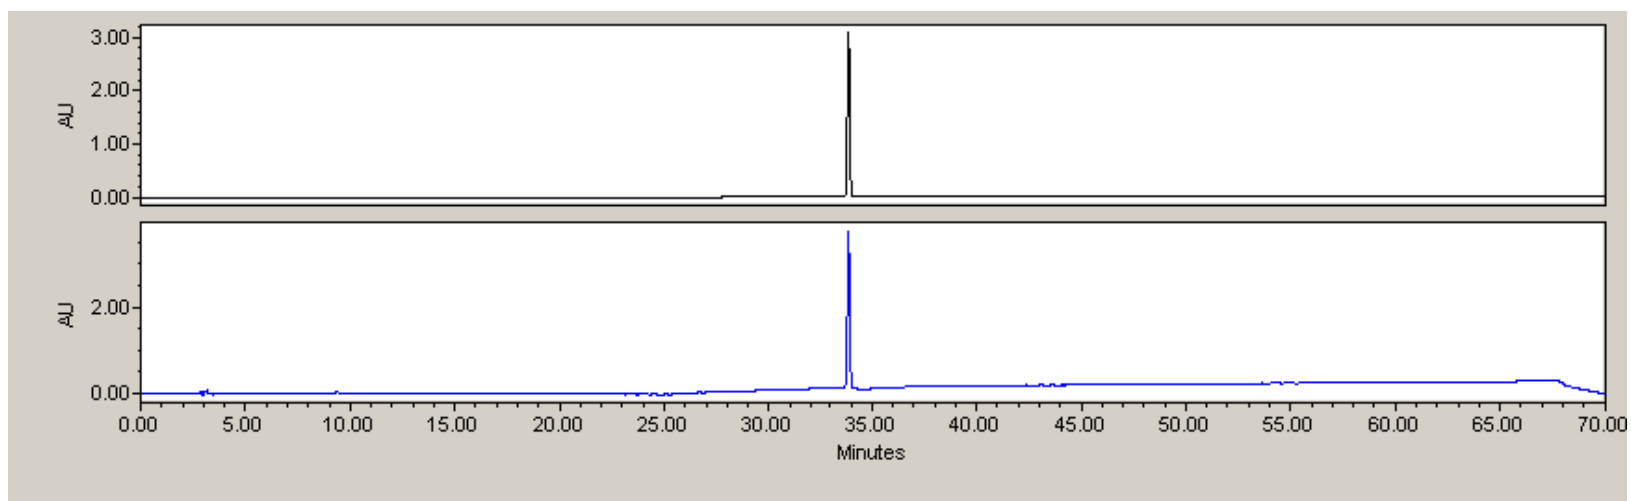

# Characterization of 45:

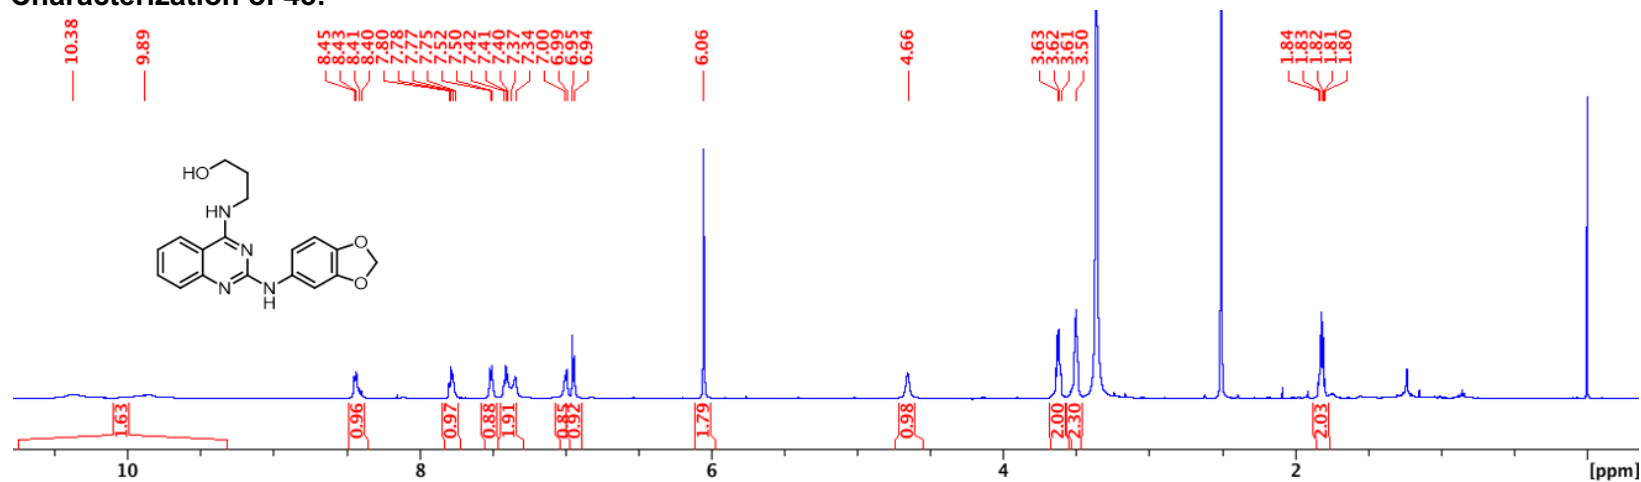

# Characterization of 46:

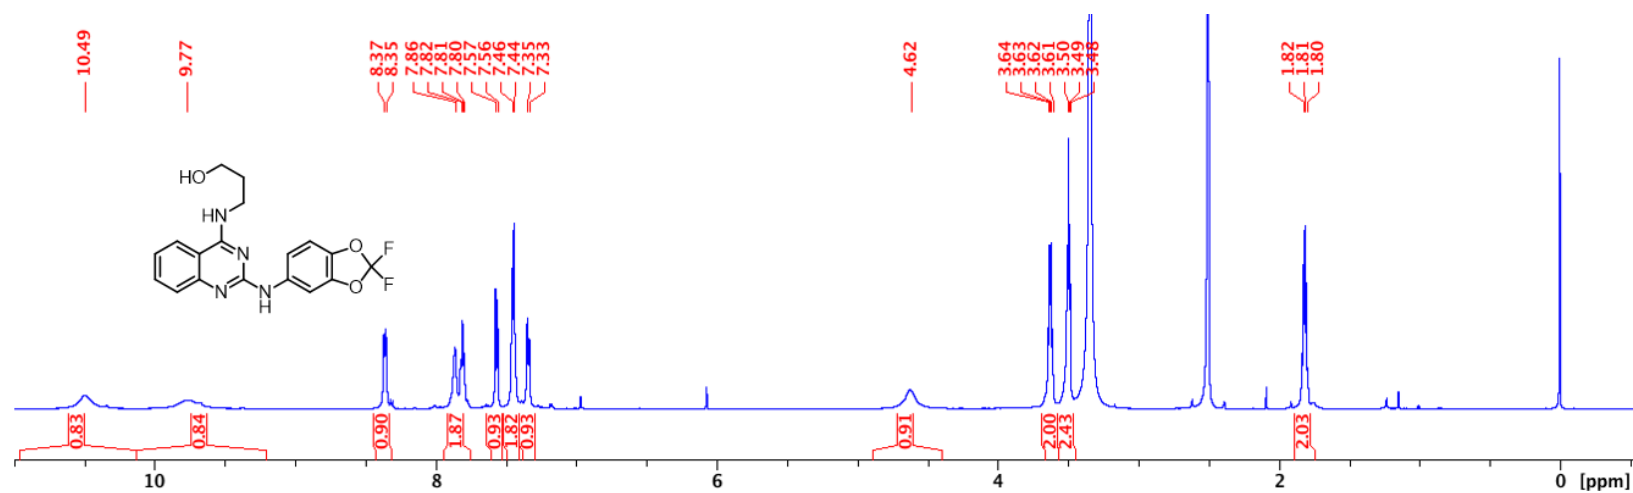

# Characterization of 47:

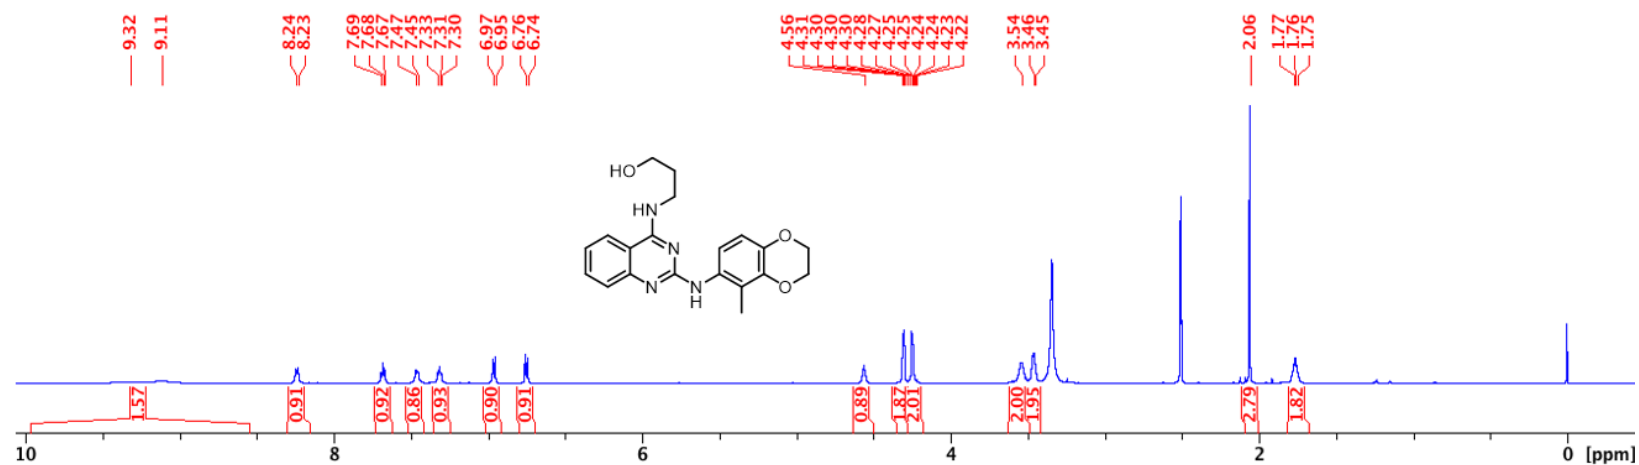

# Characterization of 48:

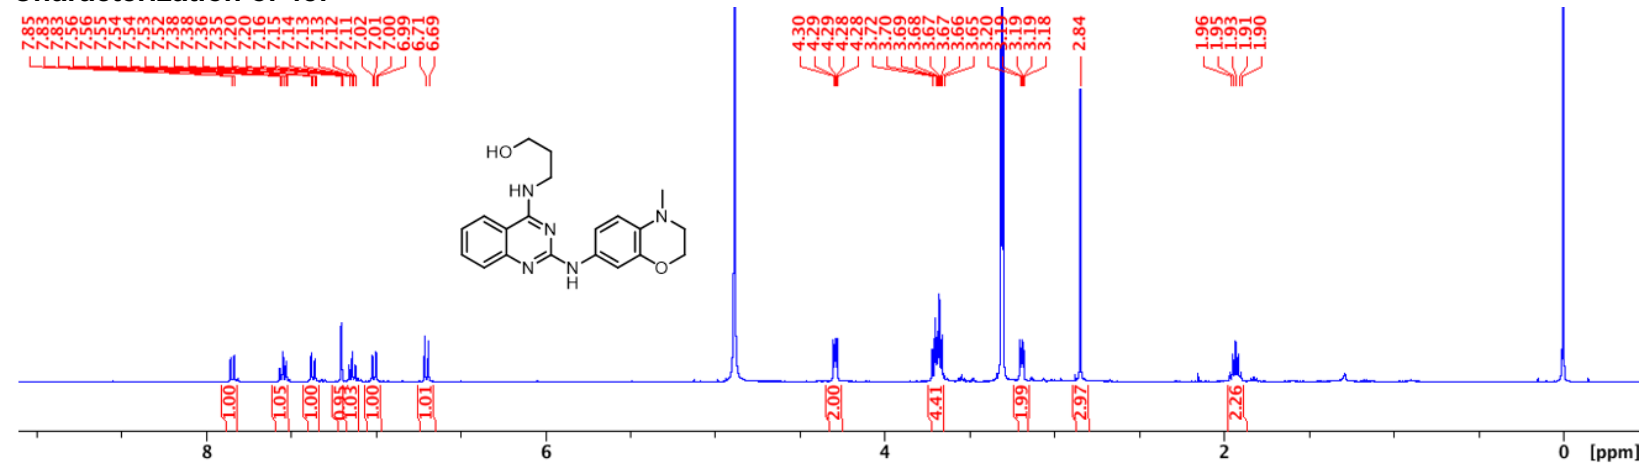

Characterization of 49:

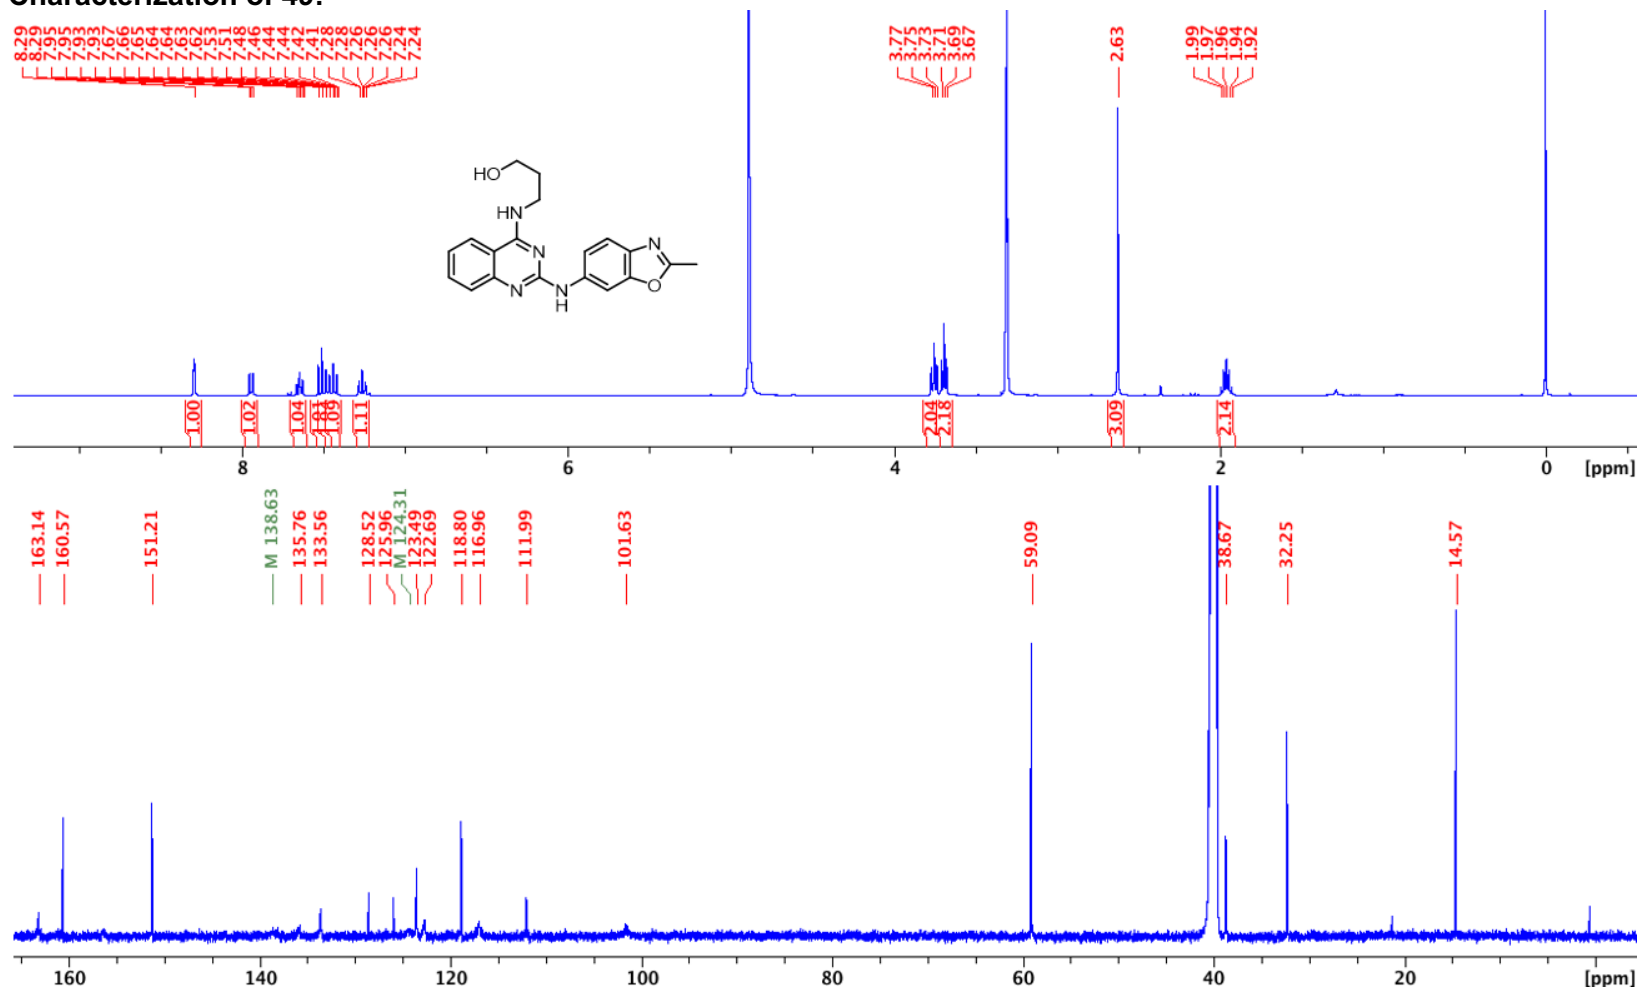

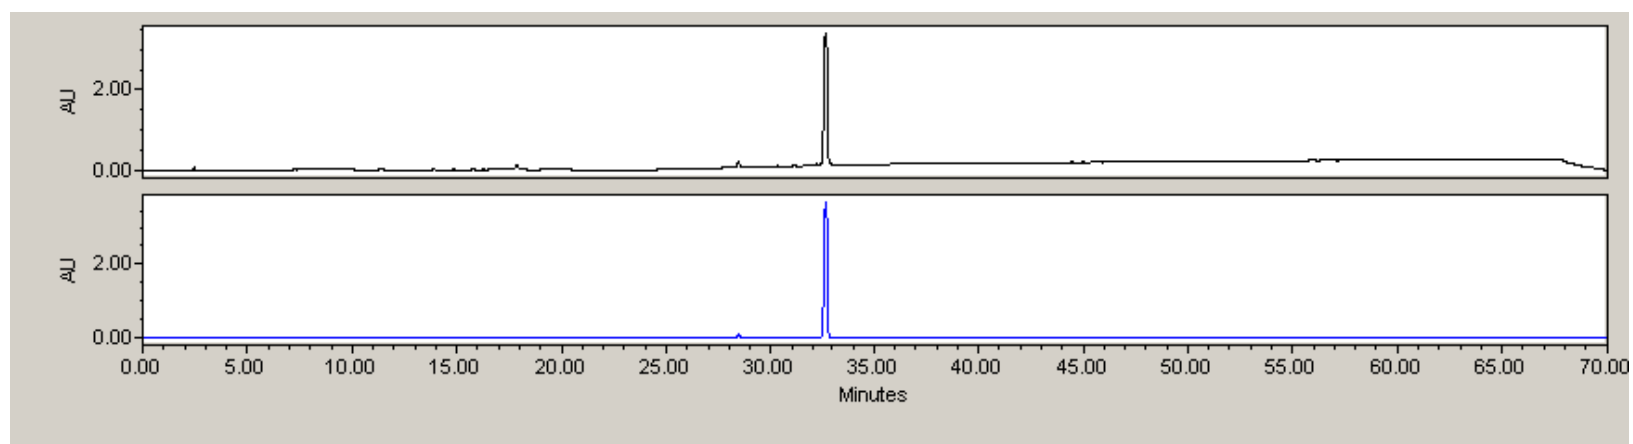

### Characterization of 50:

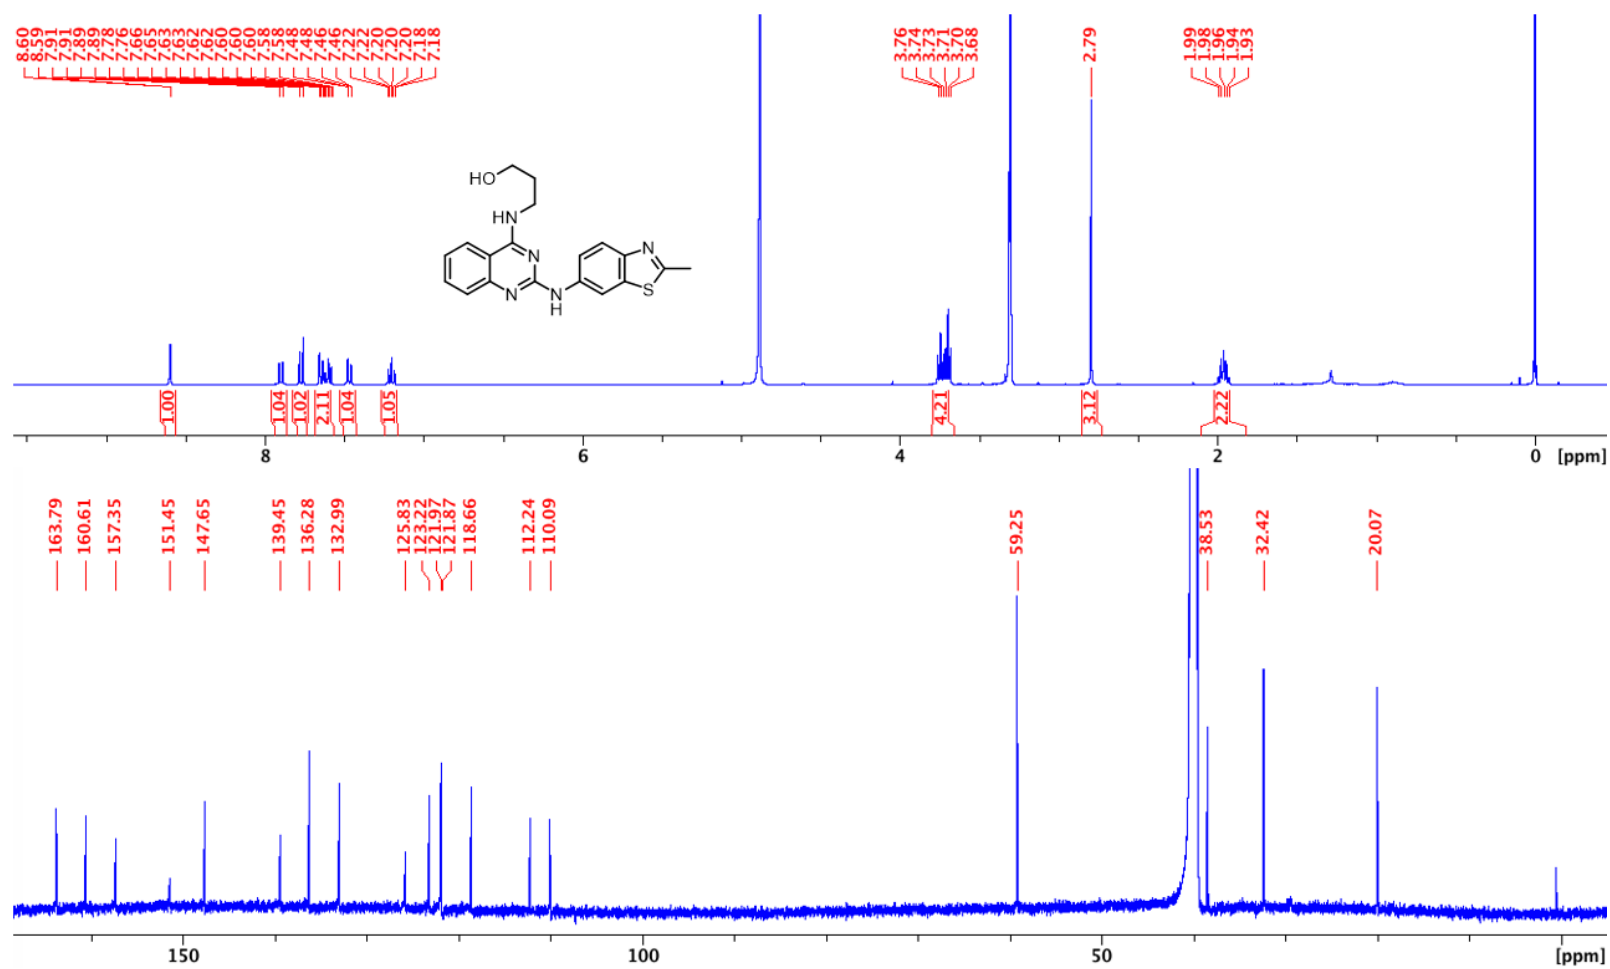

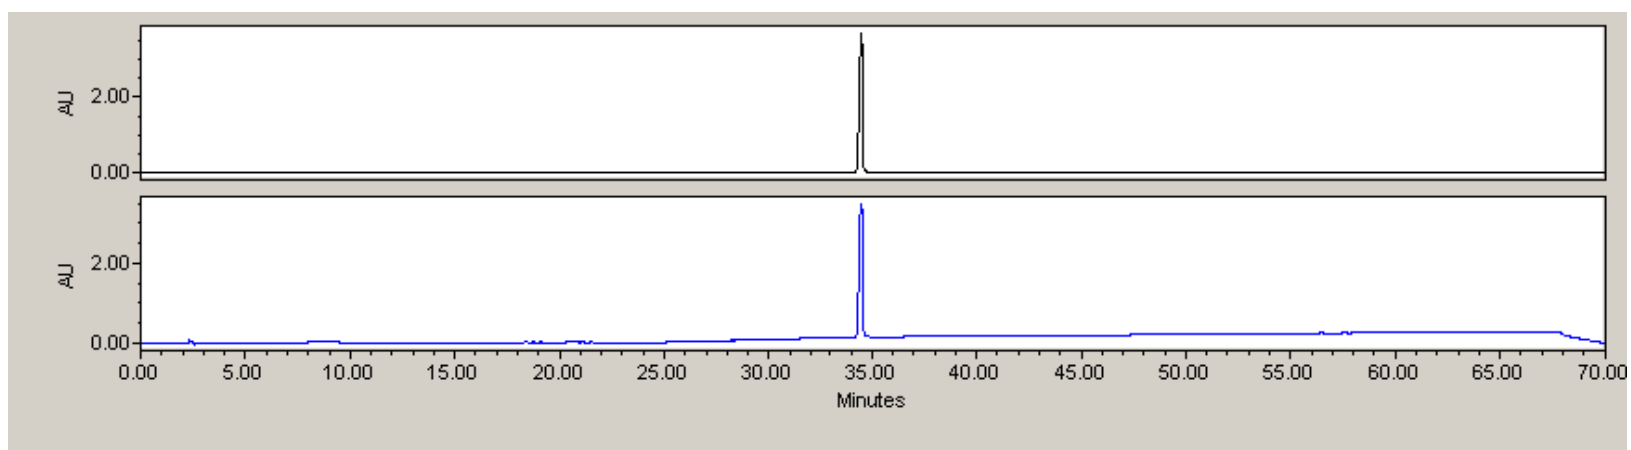

### Characterization of 51:

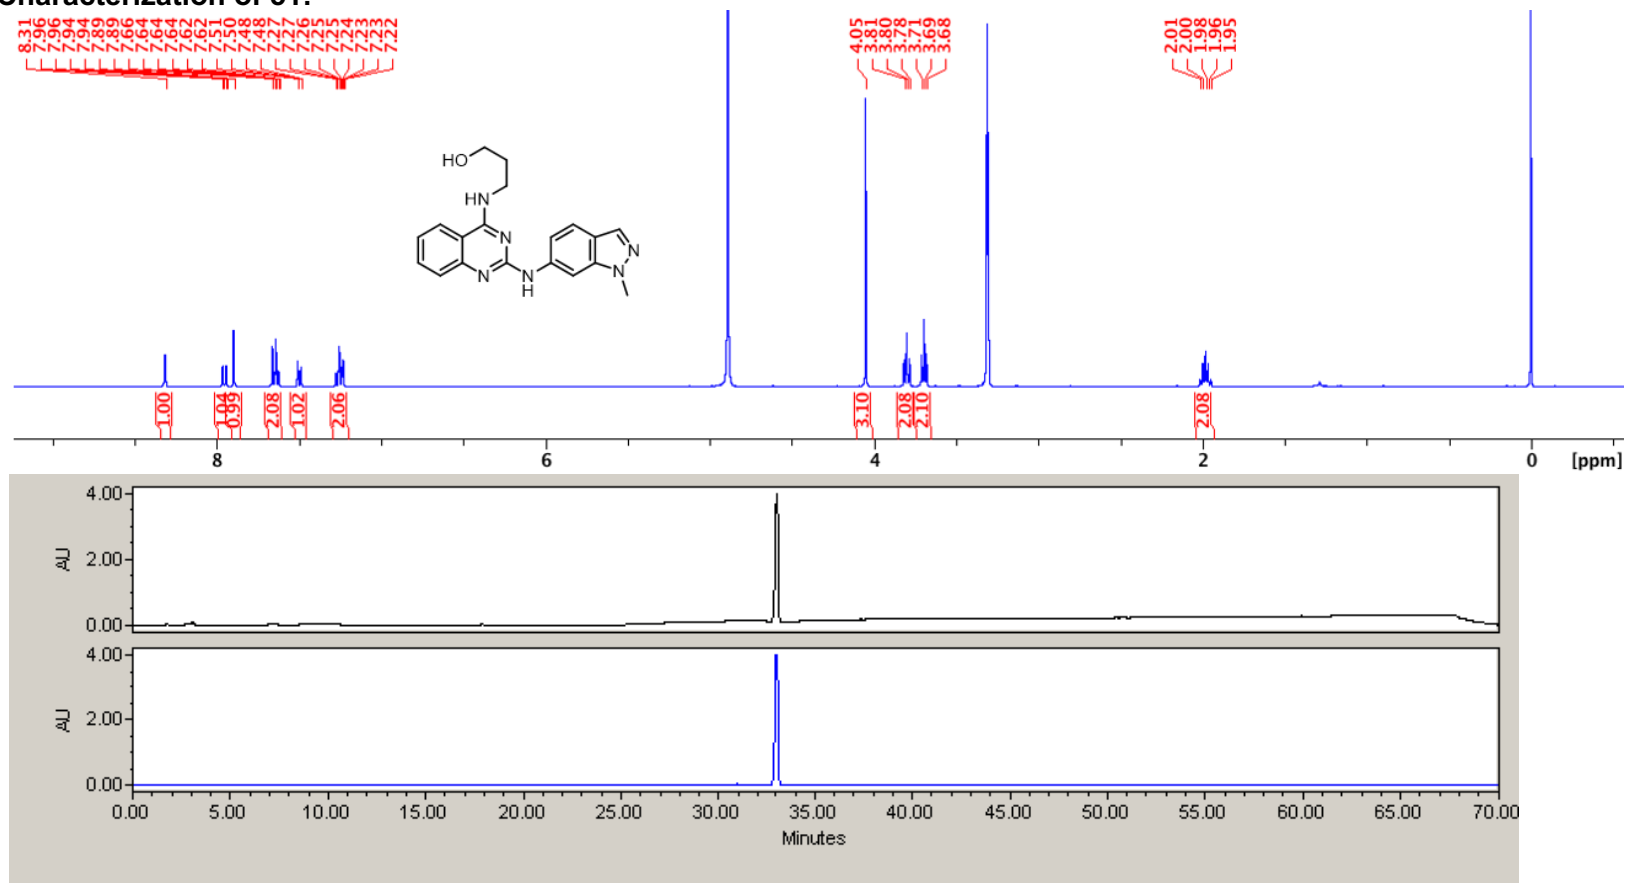

### Characterization of 52:

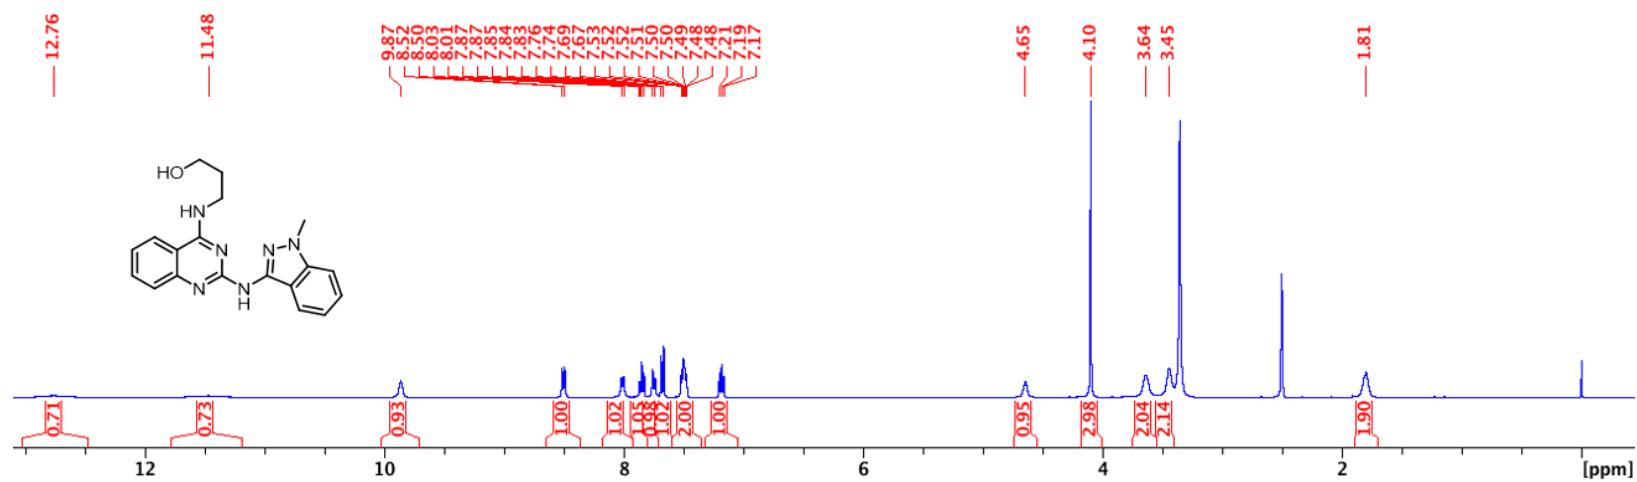

**Characterization of 53:**

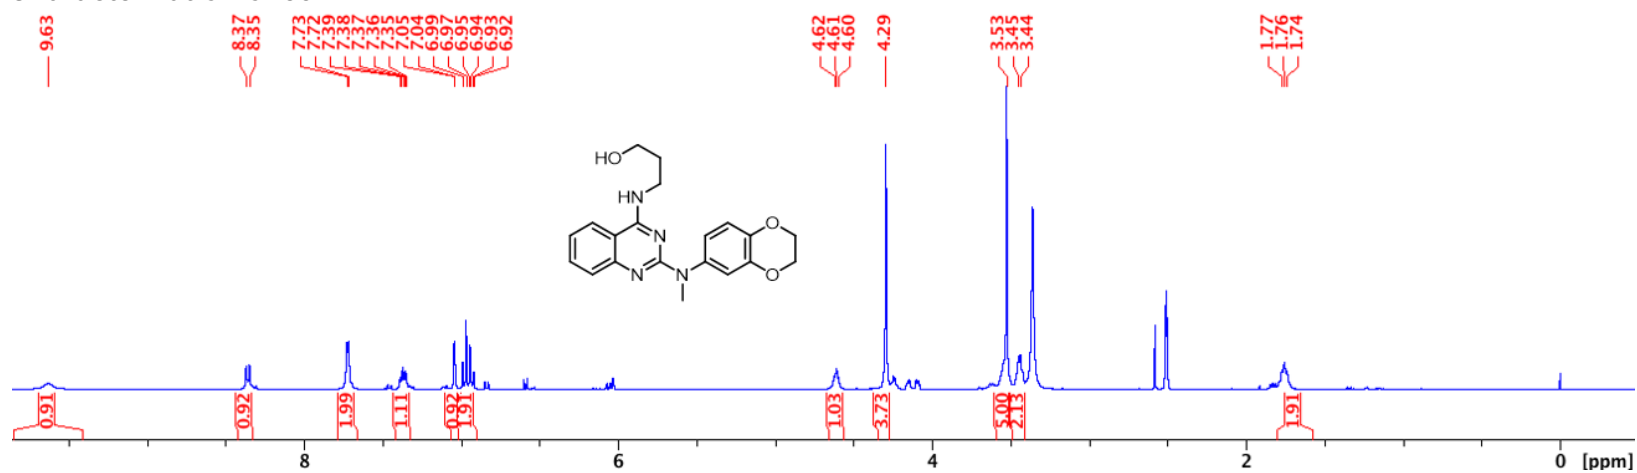

Chemical structure of compound 10 is shown above the spectrum. The structure is a benzimidazole derivative with a 2-(2-hydroxyethyl) group and a 2,3-dihydrobenzofuran-2-yl group. The NMR spectrum shows peaks at 9.40 (s, 1H), 7.60 (s, 1H), 7.31 (s, 1H), 7.30 (s, 1H), 7.02 (s, 1H), 7.00 (s, 1H), 6.78 (s, 1H), 6.76 (s, 1H), 4.55 (s, 1H), 4.53 (s, 1H), 4.52 (s, 1H), 4.21 (s, 1H), 4.19 (s, 1H), 3.48 (s, 1H), 3.47 (s, 1H), 3.45 (s, 1H), 2.24 (s, 1H), 1.74 (s, 1H), 1.73 (s, 1H), 1.71 (s, 1H). The integration values are 0.87, 0.84, 1.02, 1.02, 1.00, 0.98, 4.05, 4.20, 4.85, 1.97, 5.99.

Chemical structure of compound 10 is shown above the spectrum. The structure consists of a 2,3-dihydro-1,4-benzodioxine ring system connected via a hydrazine bridge to a 2,3-dihydro-1,4-benzodioxine ring system. The hydrazine bridge is in the trans configuration.

<sup>1</sup>H NMR spectrum (CDCl<sub>3</sub>) of compound 10. The spectrum shows peaks corresponding to the structure, with integration values and chemical shifts (ppm) indicated.

Chemical shifts (ppm): 8.86, 7.45, 7.13, 7.11, 7.10, 7.03, 7.02, 7.01, 6.70, 6.68, 4.80, 4.66, 4.65, 4.45, 4.45, 4.44, 4.20, 4.19, 4.17, 4.16, 4.15, 3.49, 3.48, 3.47, 3.45, 3.44, 3.42, 3.39, 1.76, 1.74, 1.72, 1.71, 1.69.

Integration values: 0.91, 1.00, 1.03, 0.90, 1.00, 2.08, 2.04, 0.99, 4.09, 2.16, 2.42, 2.14.

# Characterization of 56:

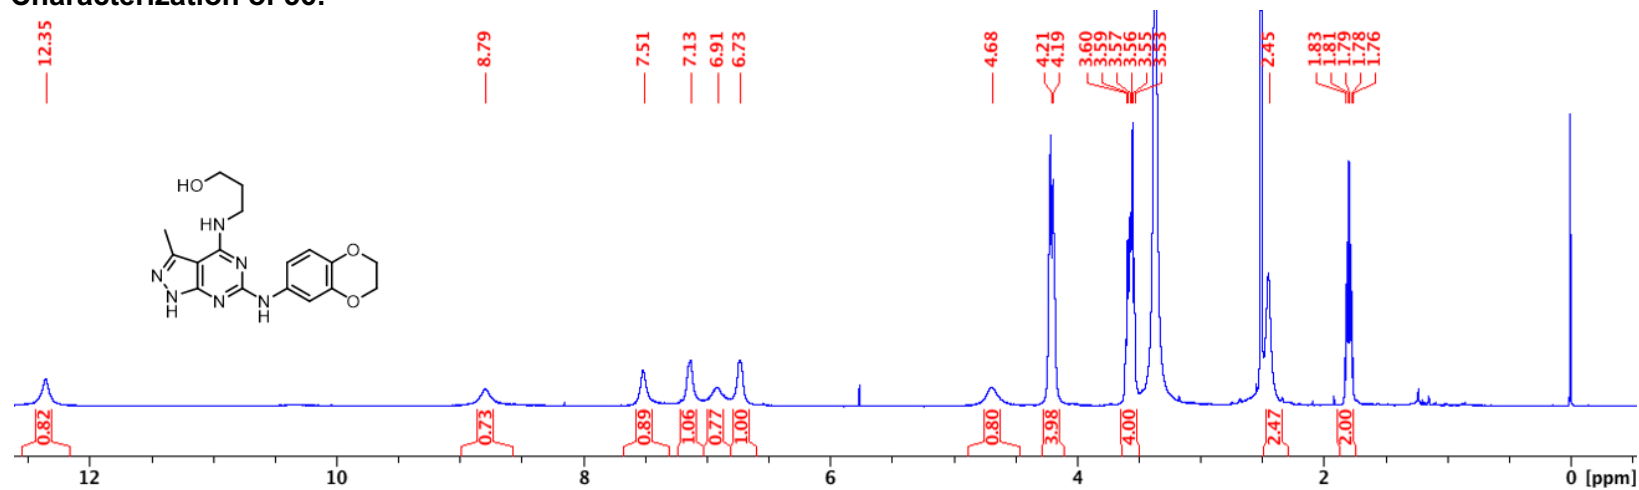

# Characterization of 57:

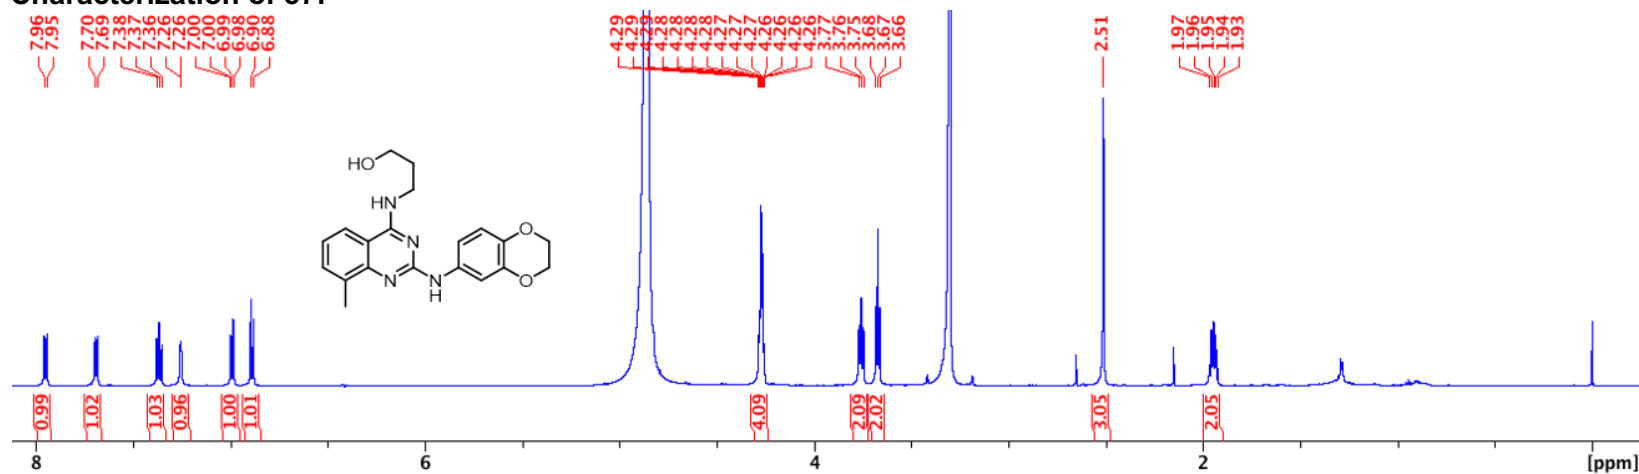

Characterization of 58:

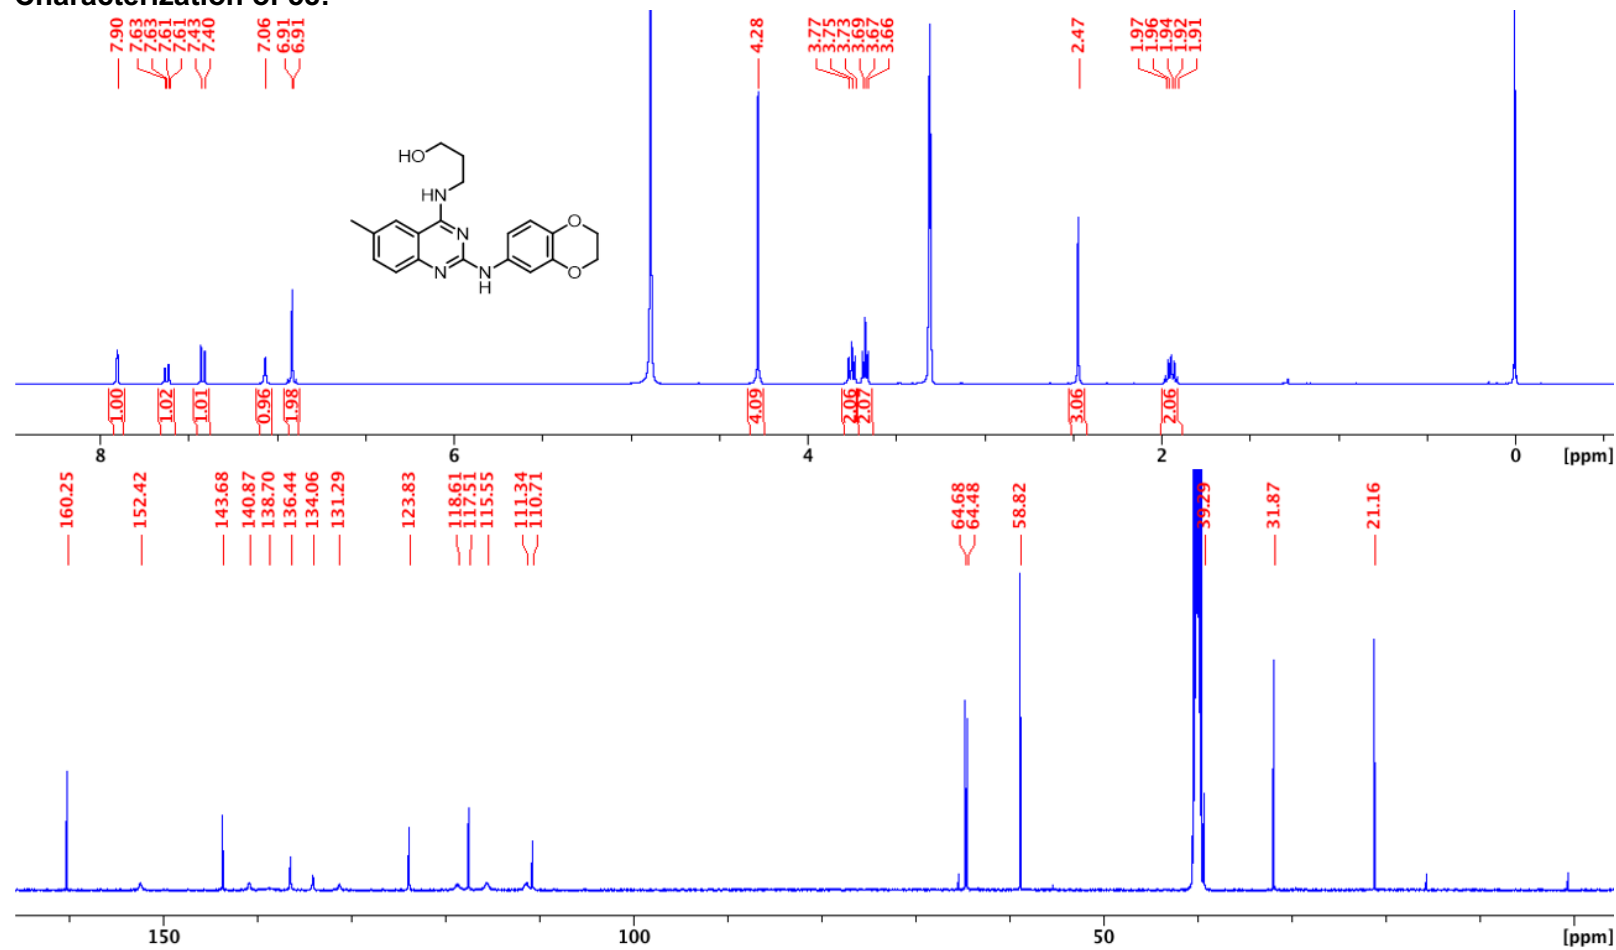

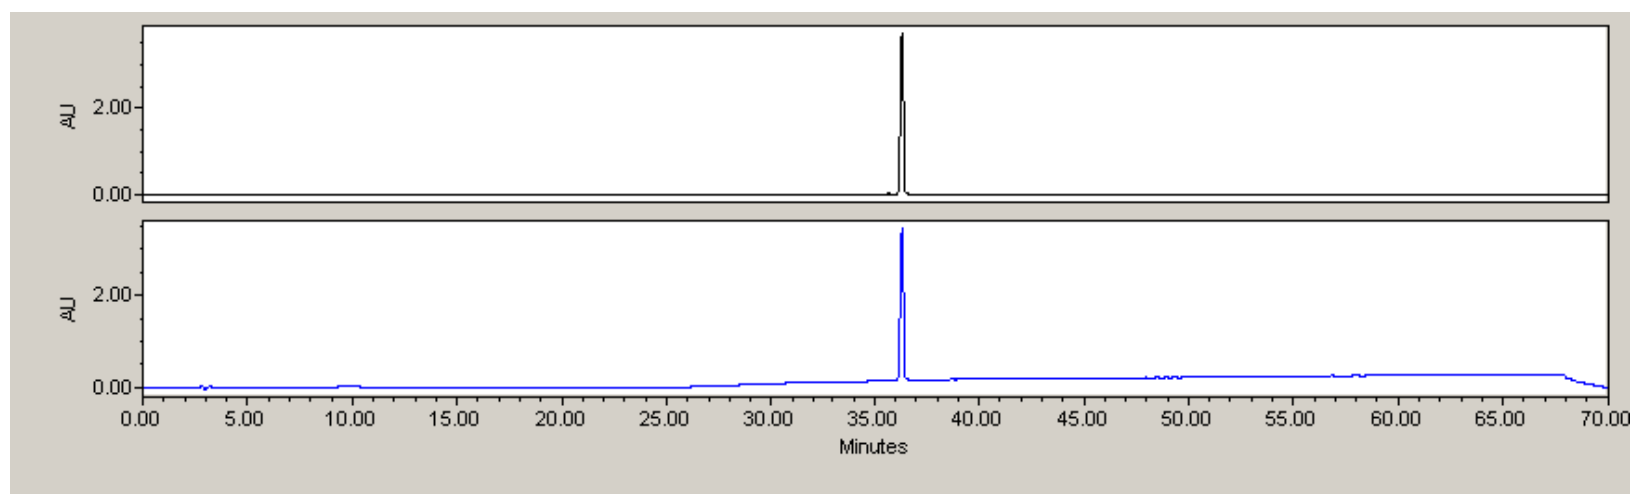

# Characterization of 59:

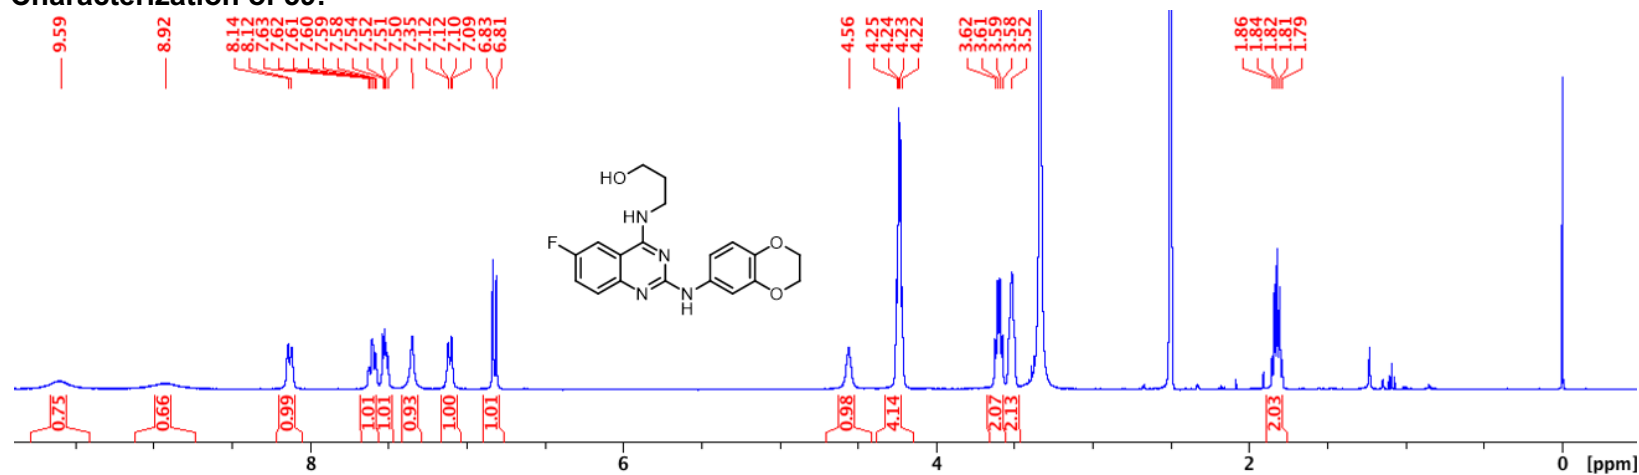

# Characterization of 60:

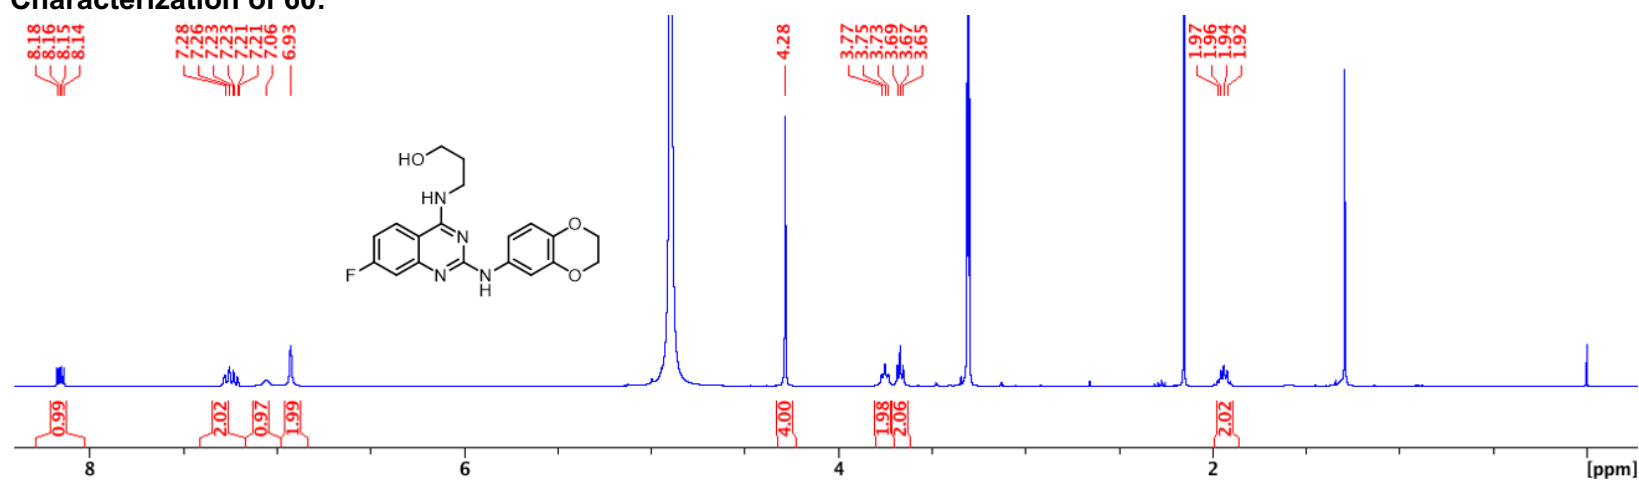

Characterization of 61:

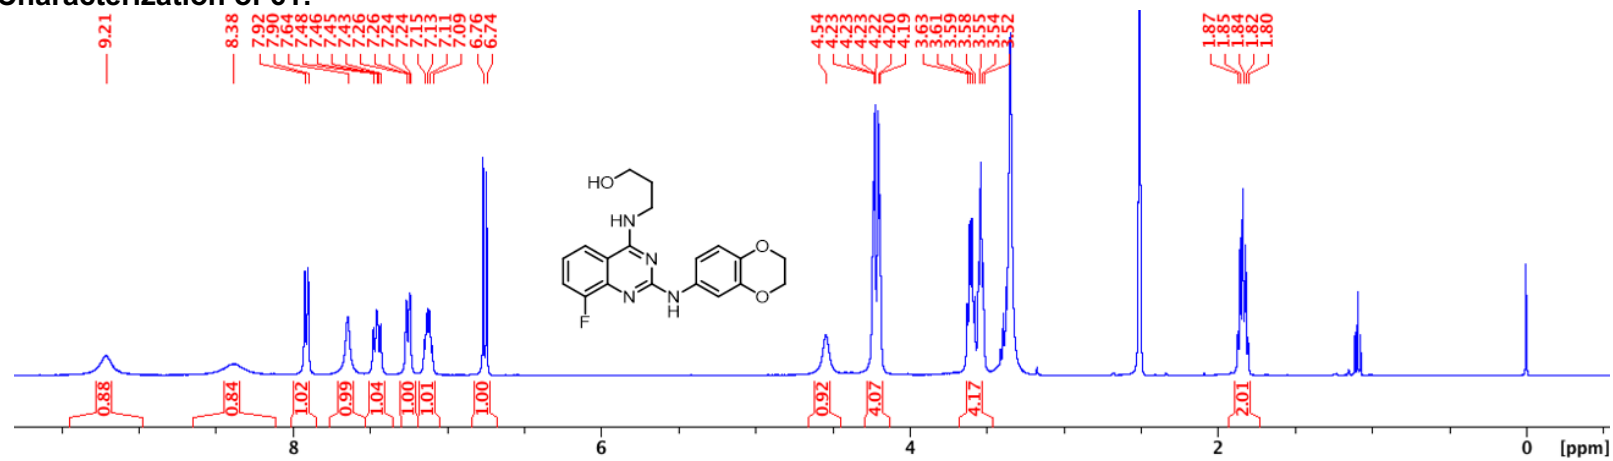

# Characterization of 62:

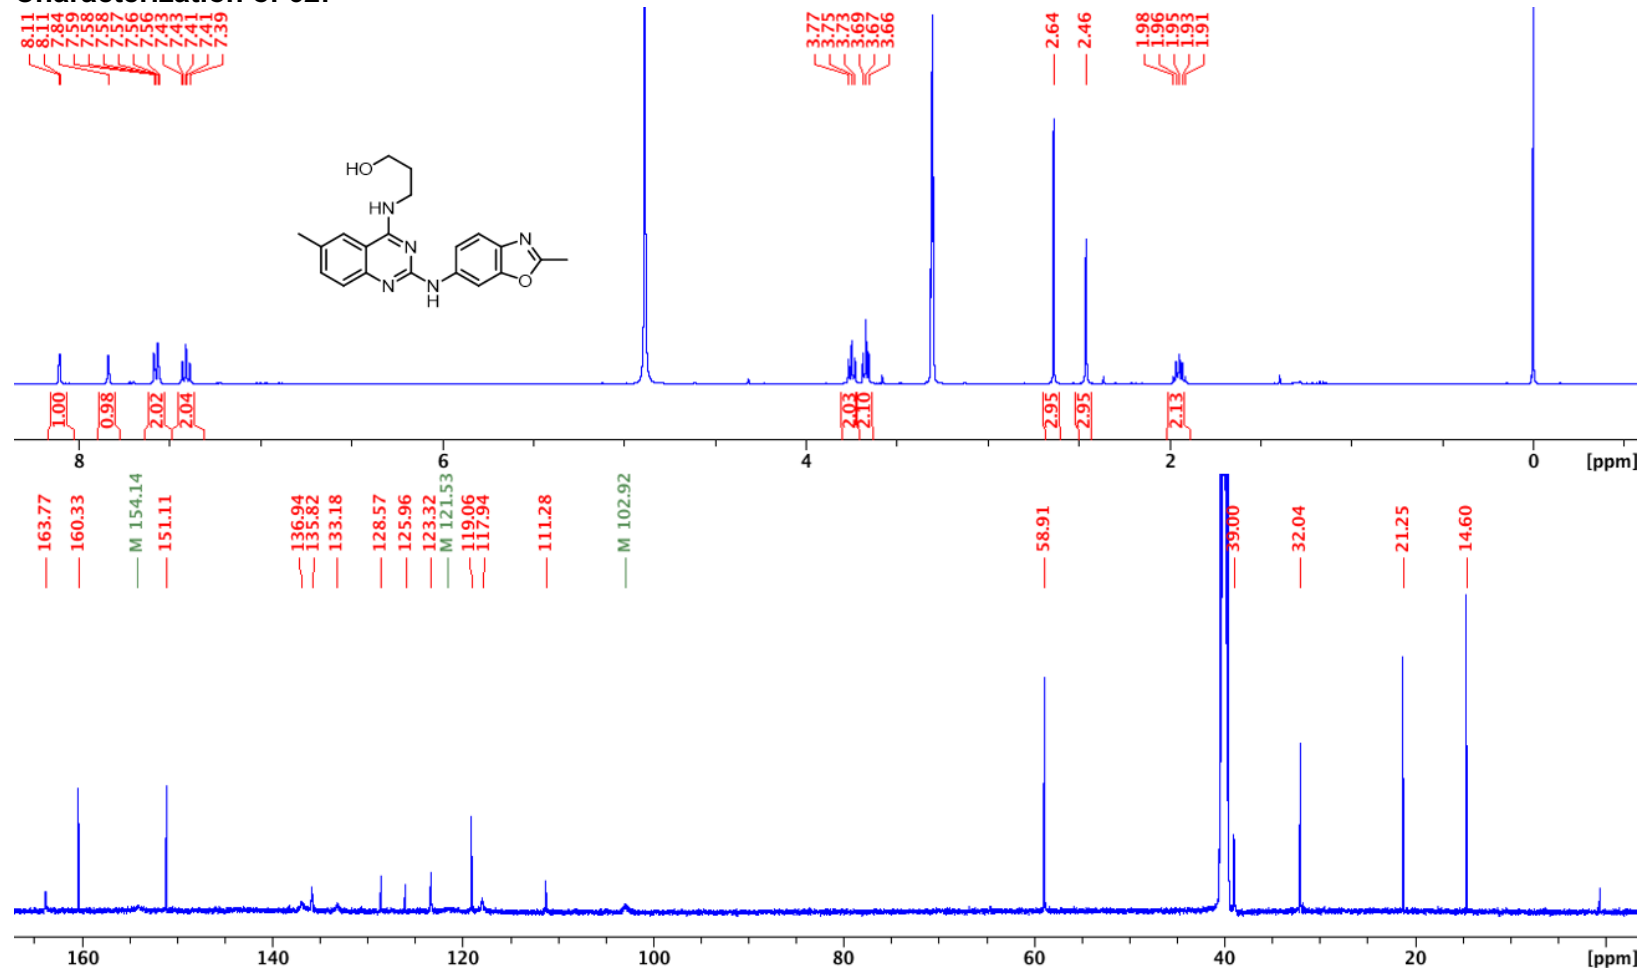

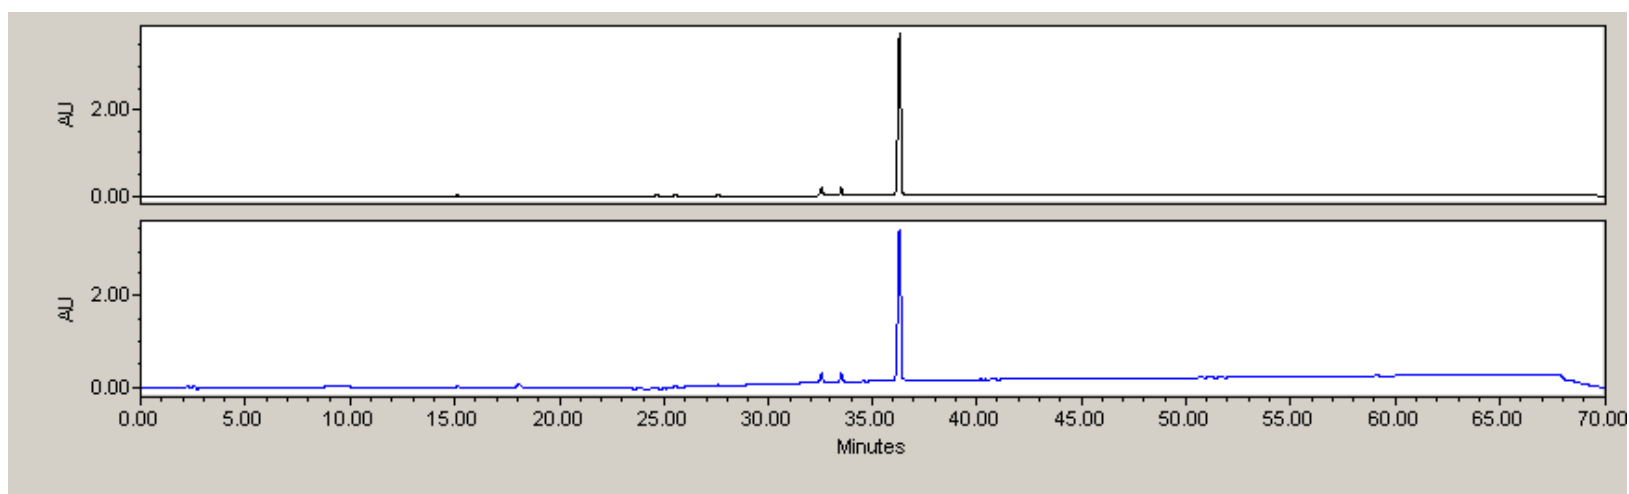

Characterization of 63:

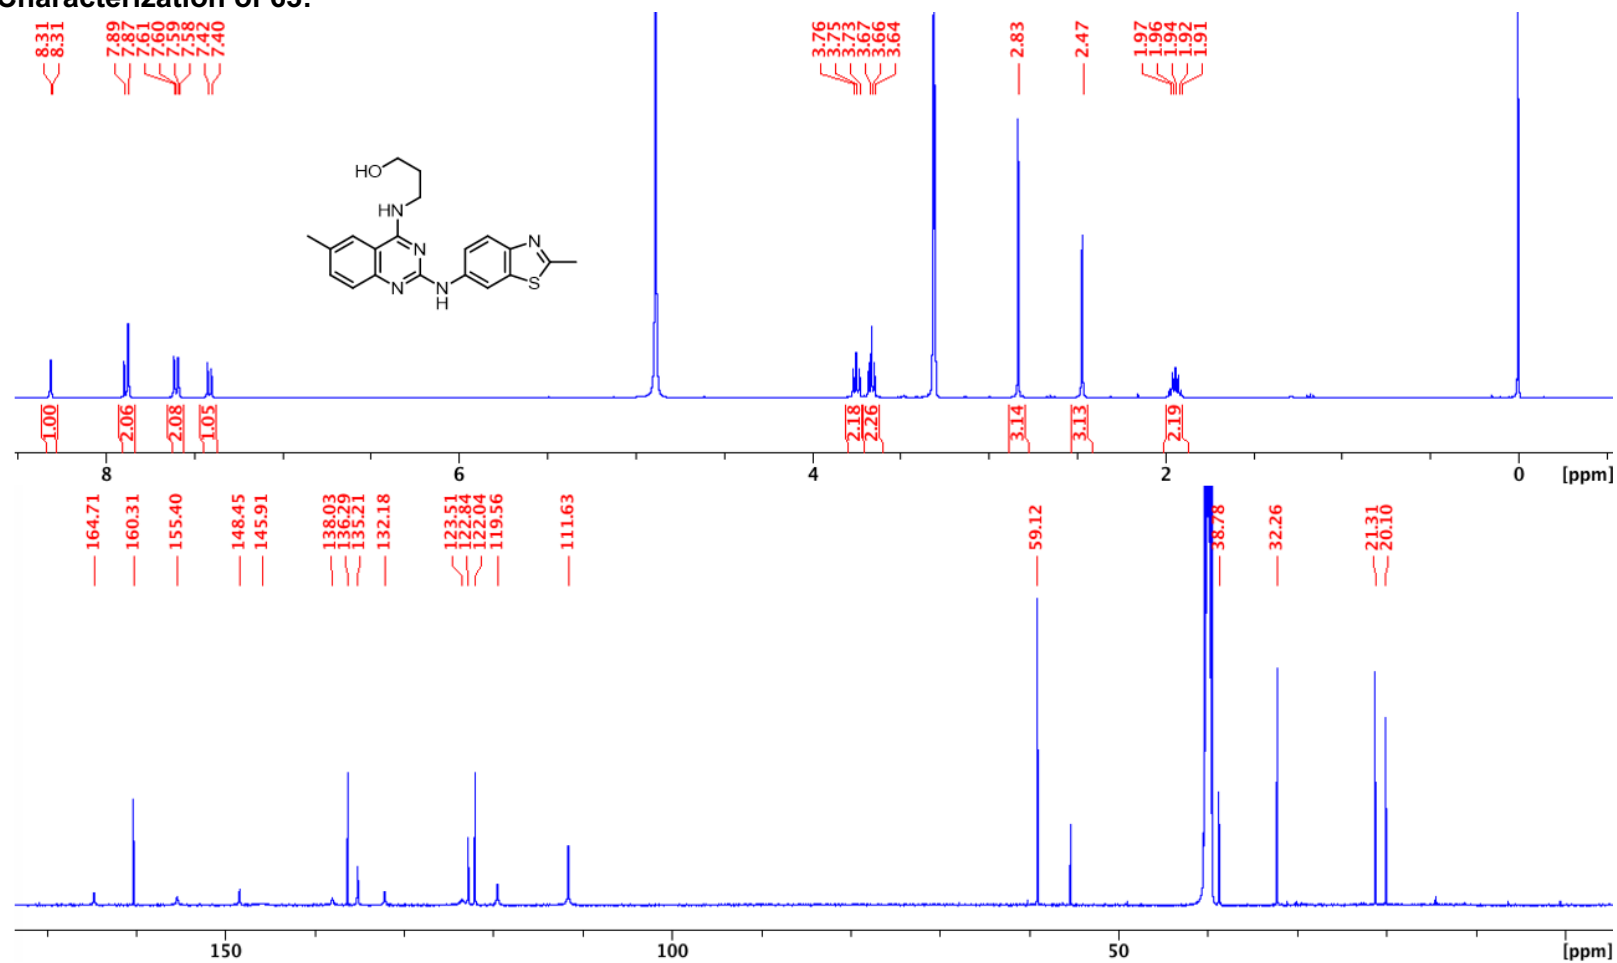

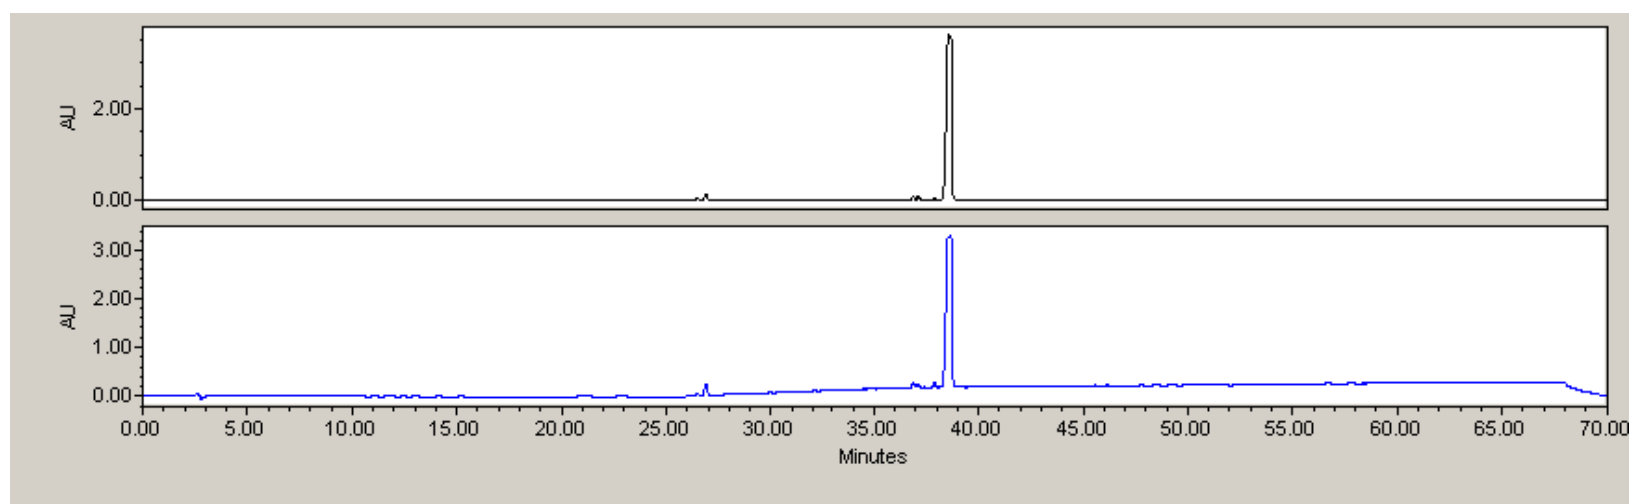

# Characterization of 64:

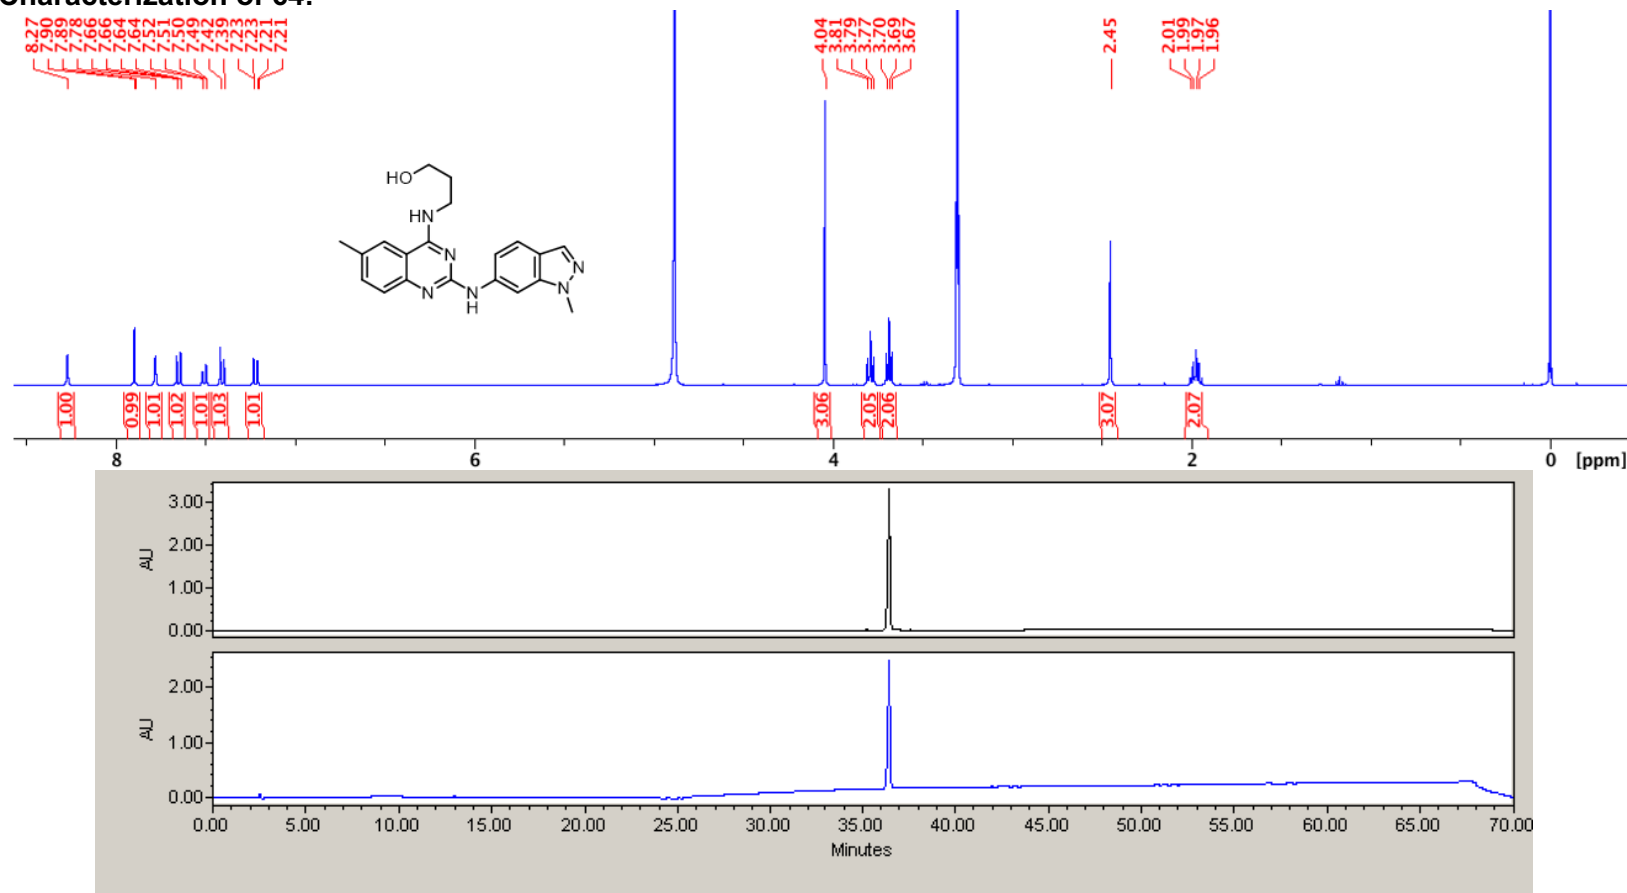

### Characterization of Intermediate D:

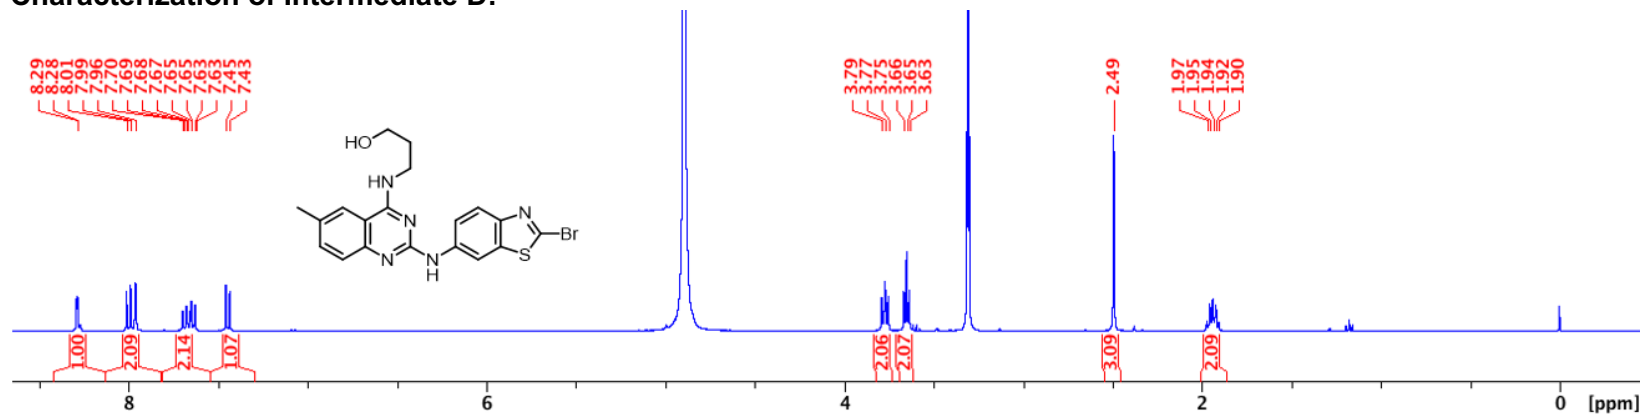

### Characterization of 65:

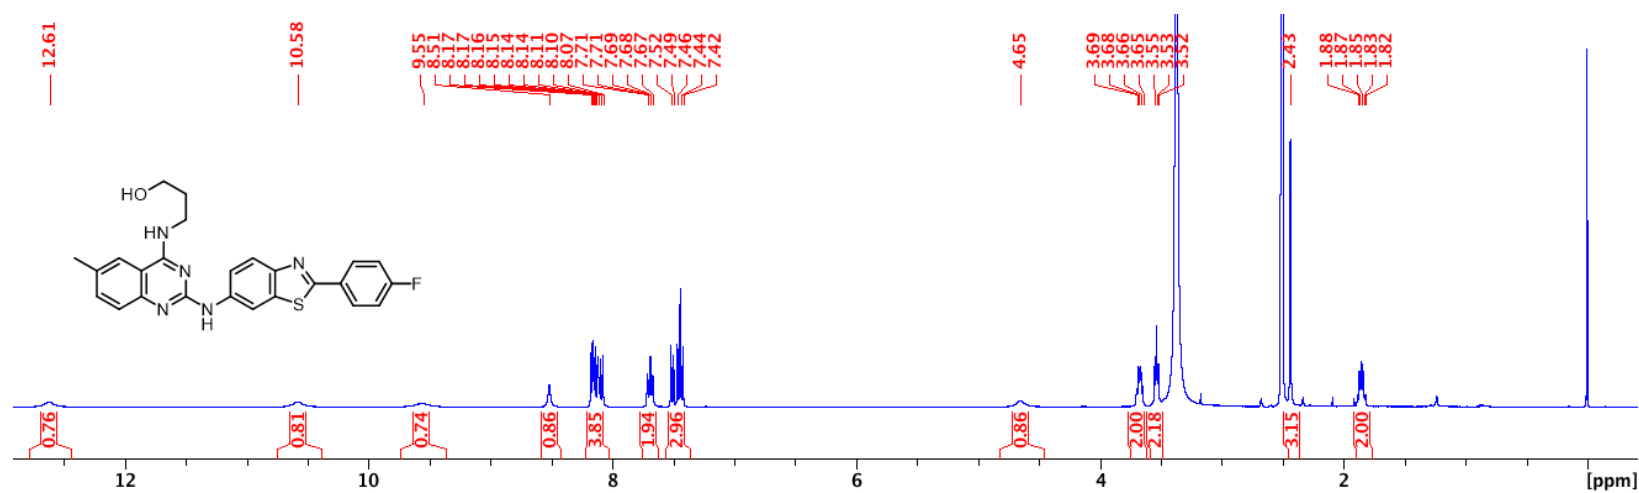

### Characterization of 66:

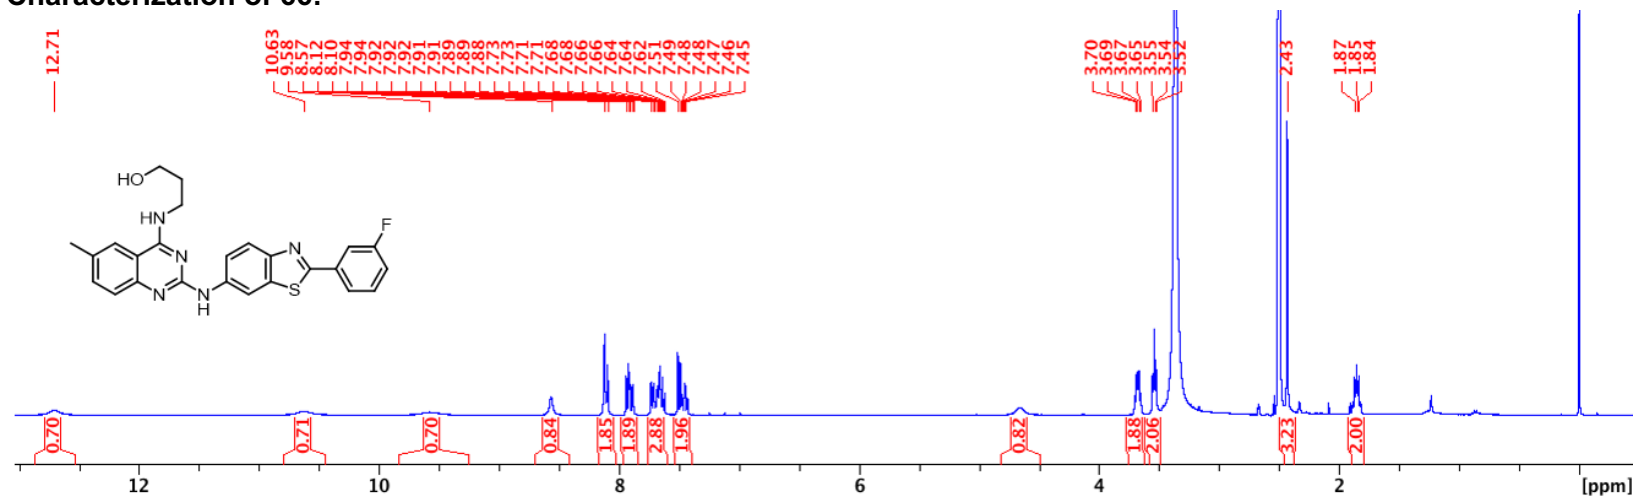

### Characterization of 67:

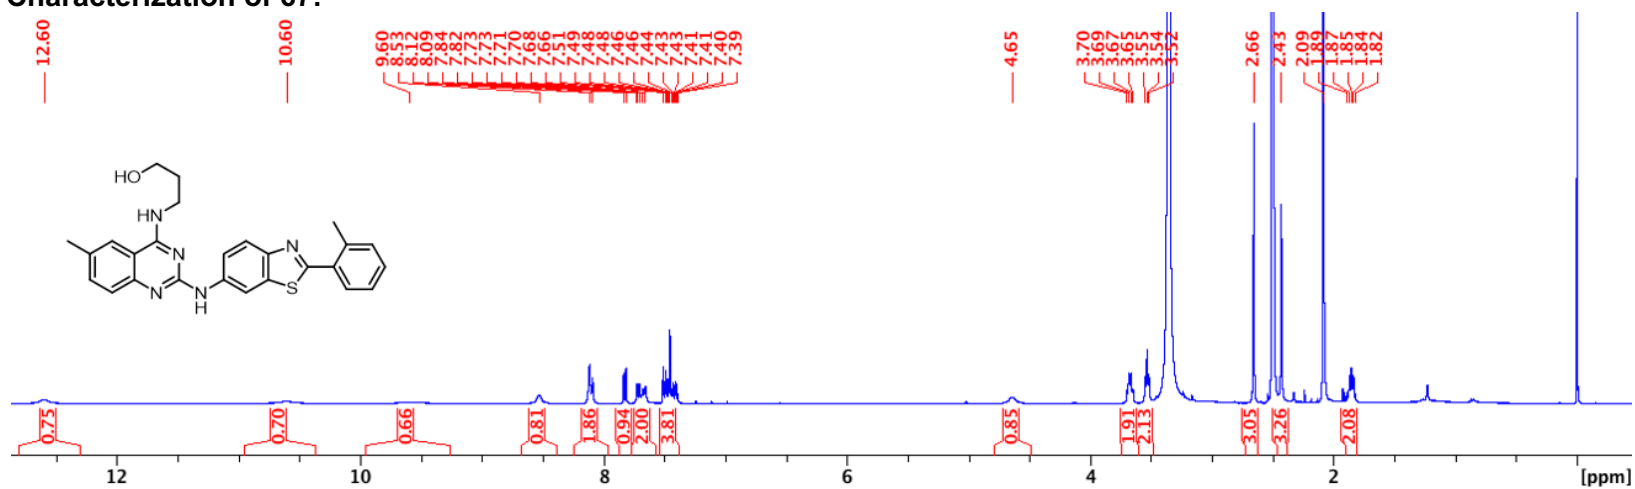

### Characterization of 68:

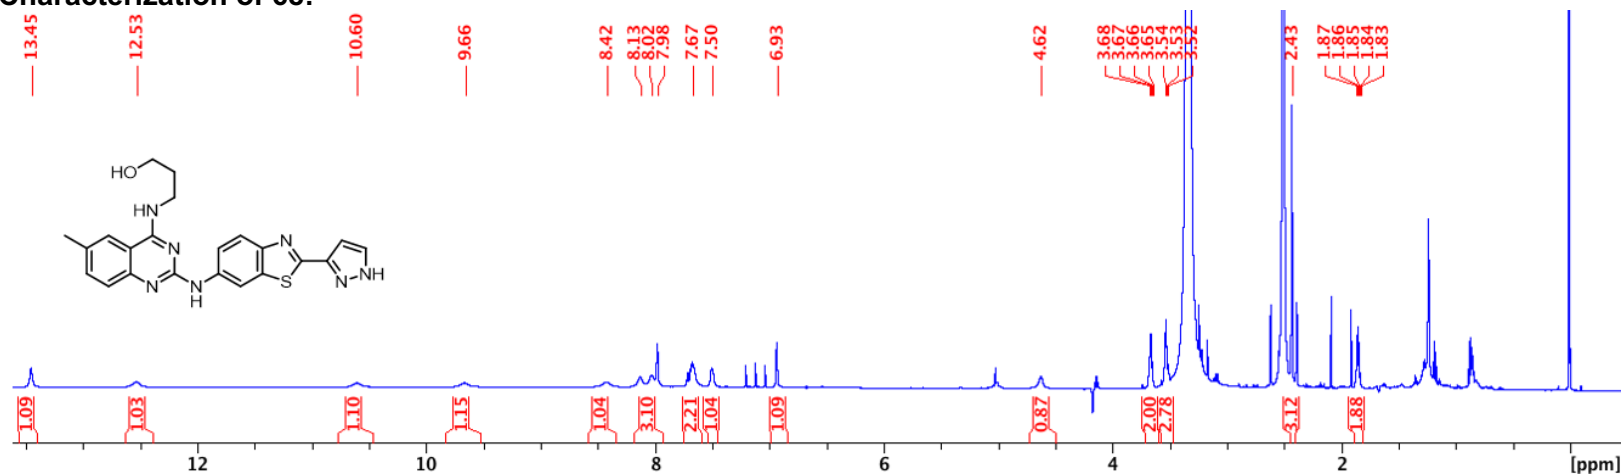

### Characterization of 69:

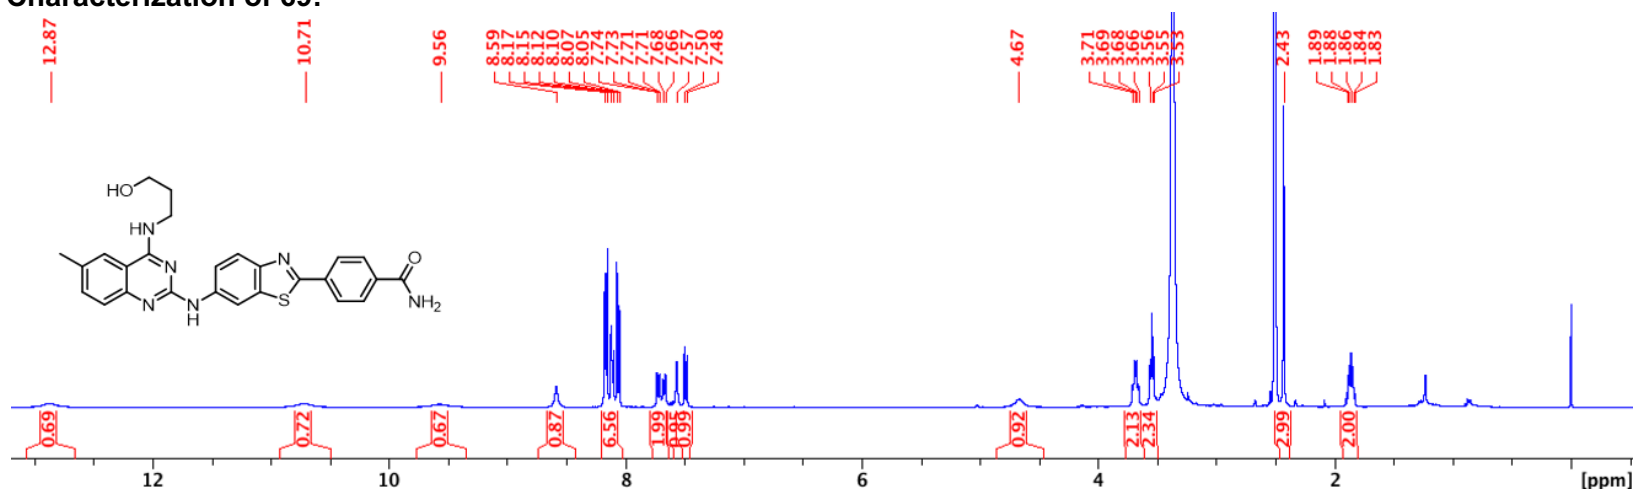

# Characterization of 70:

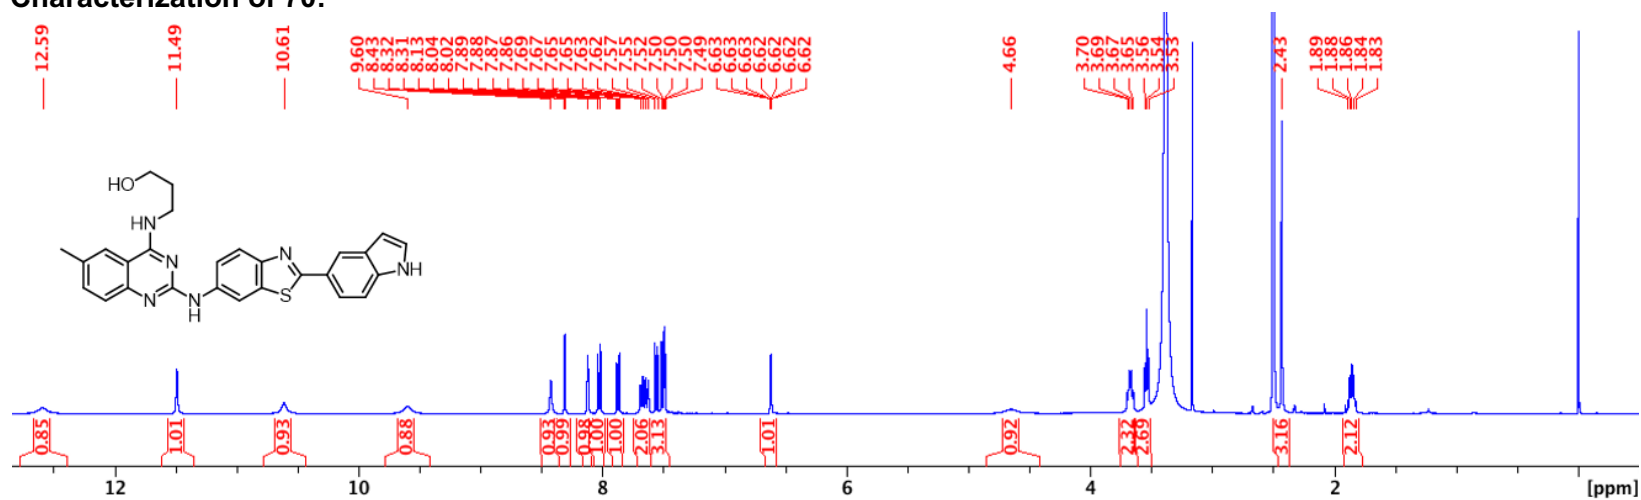

# Characterization of 71:

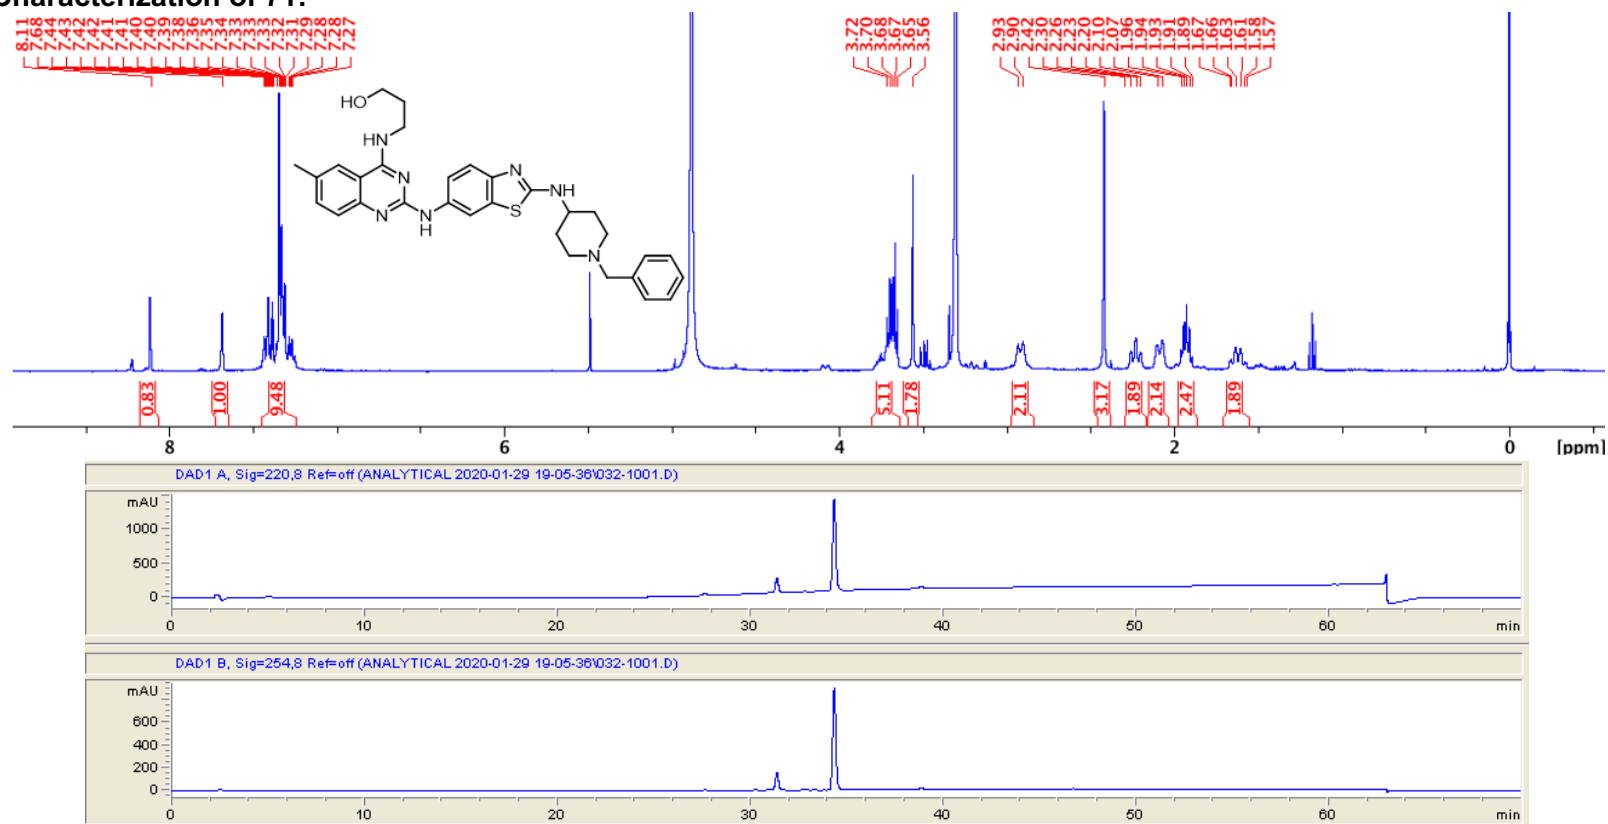

Cc1ccc2nc(NCCO)c3nc(Nc4ccc5nnc(N6CCOCC6)s4)c5n2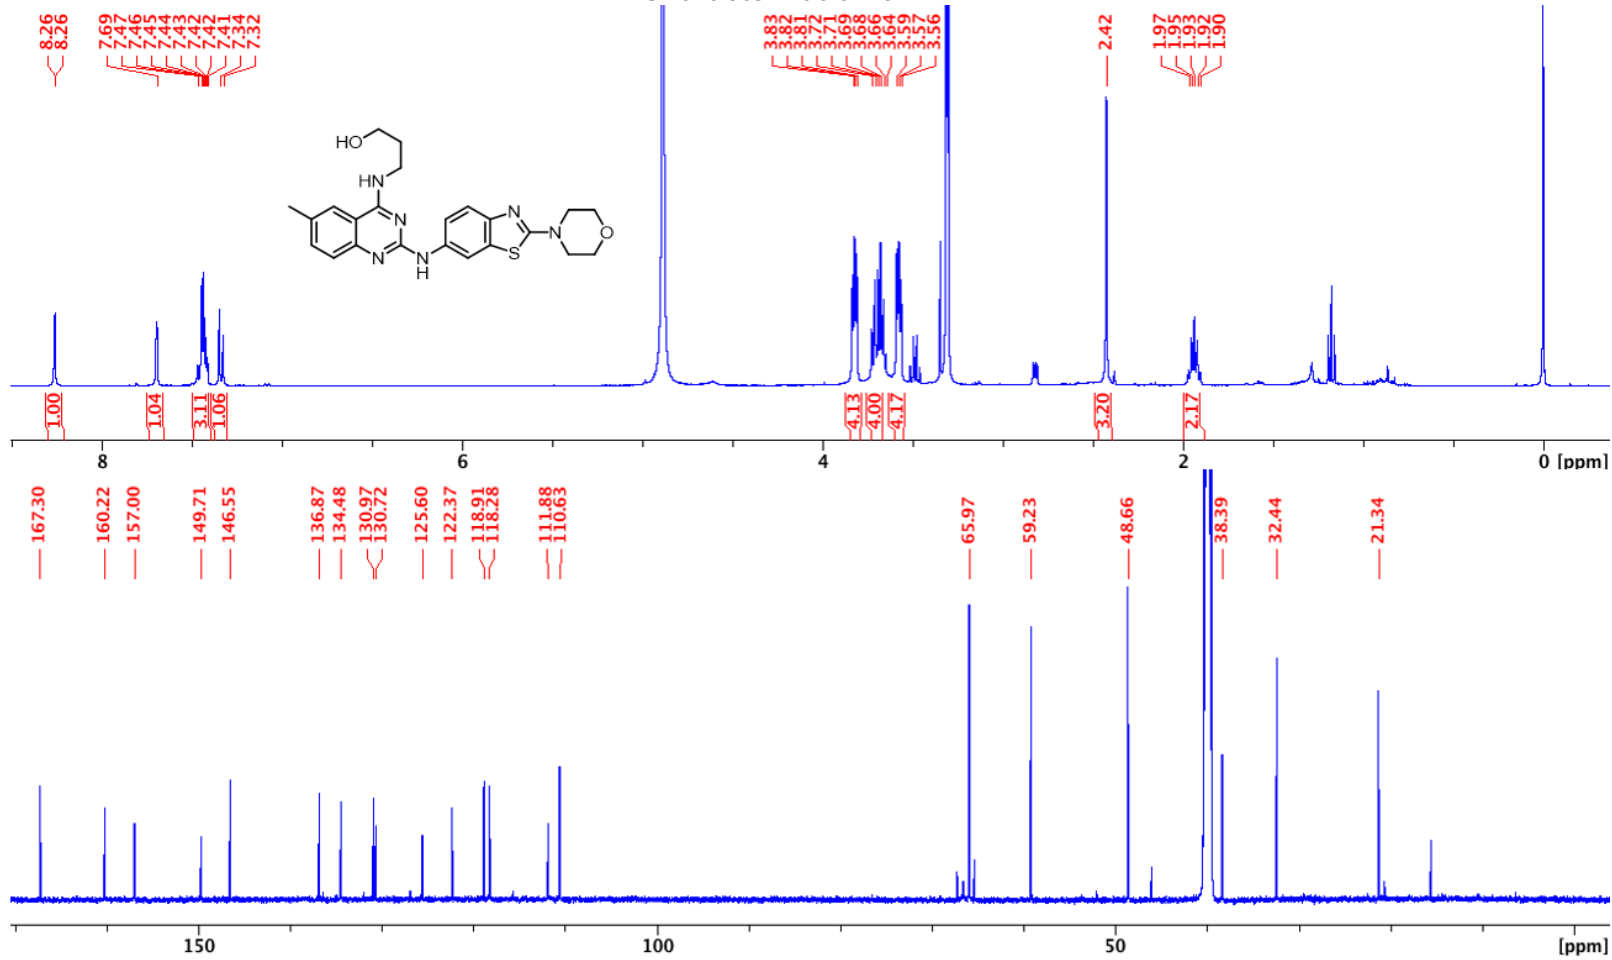

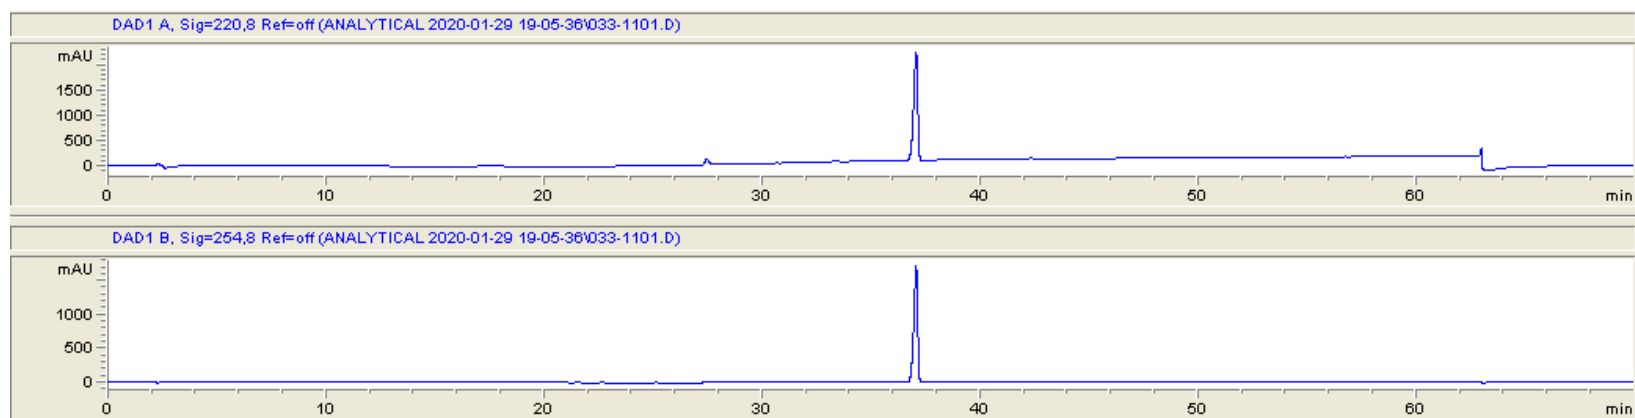

# Characterization of 73:

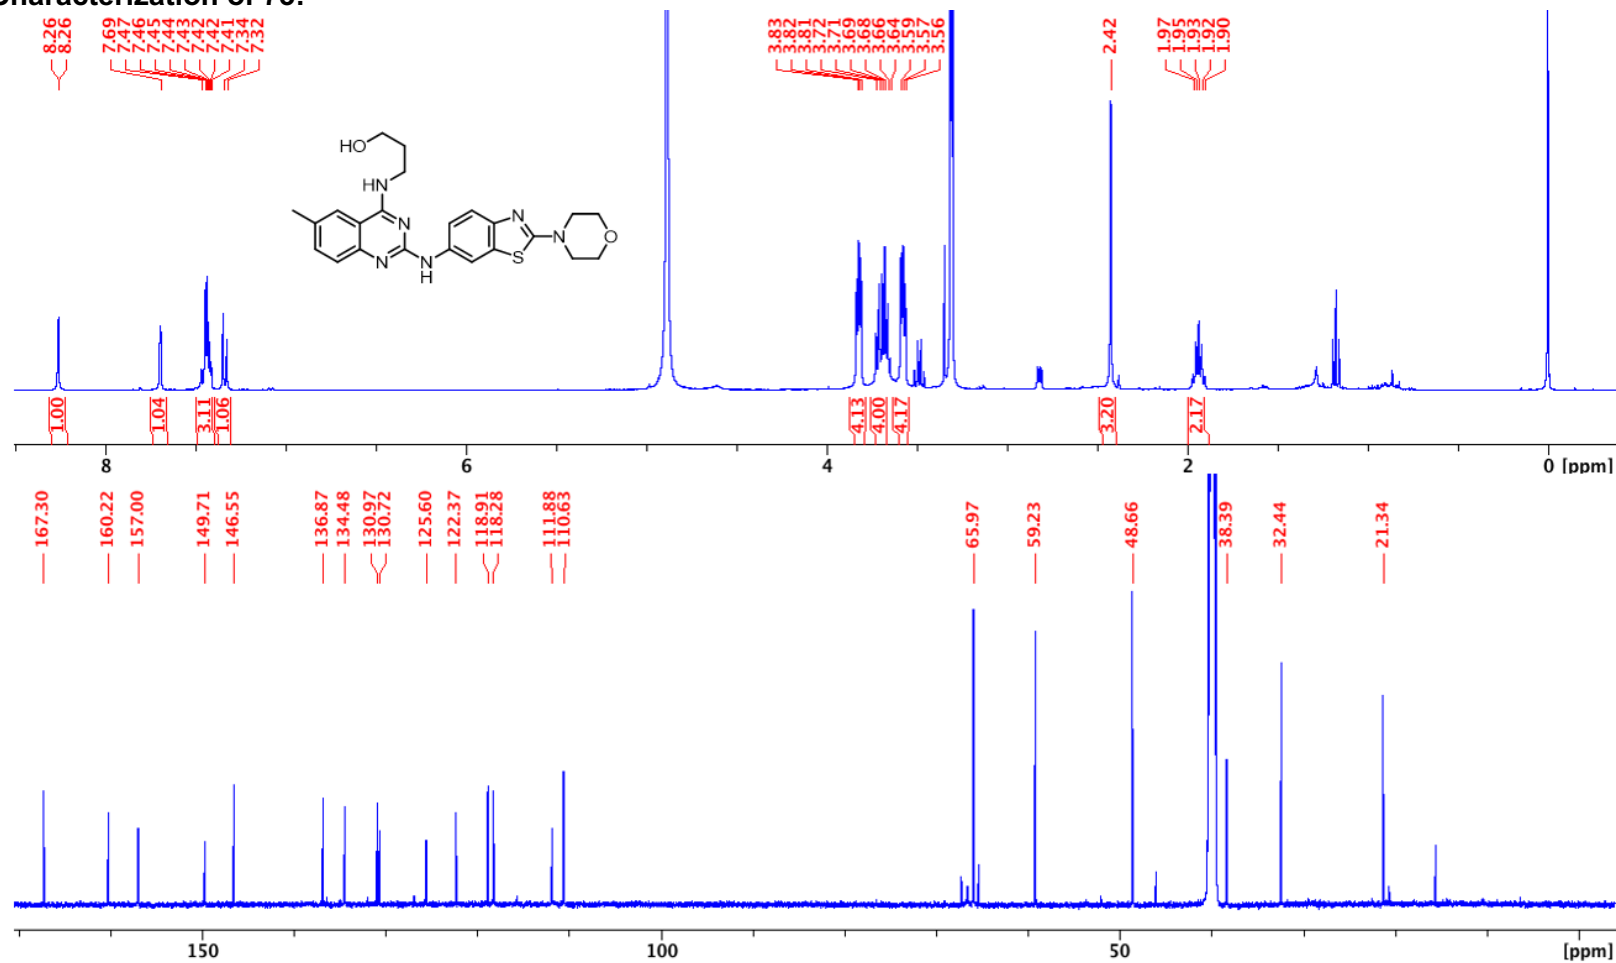

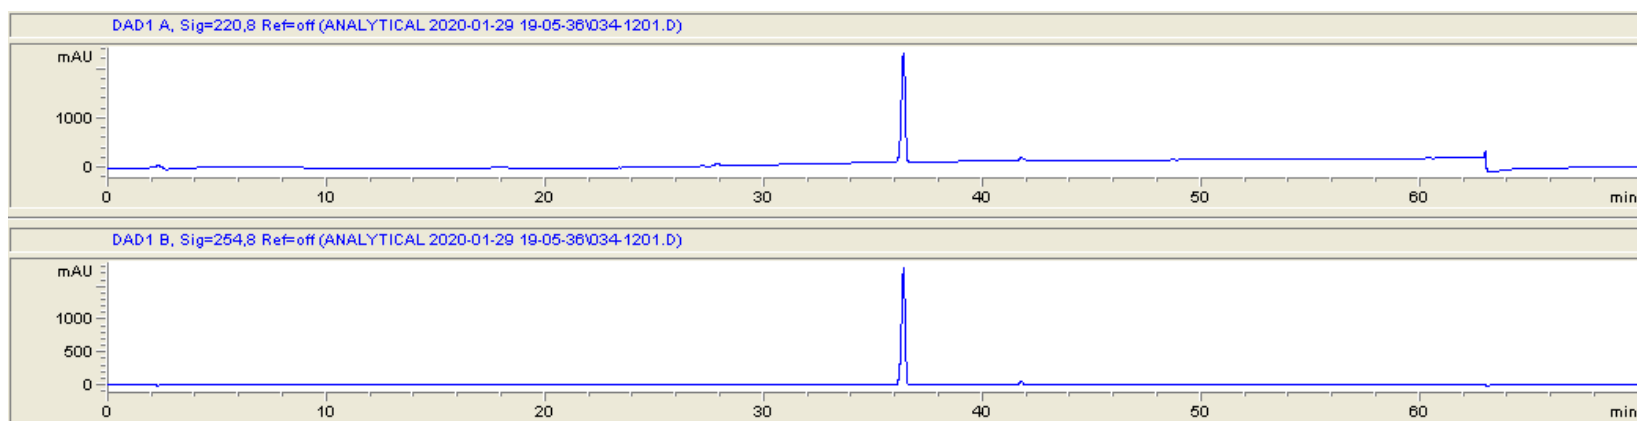

# Characterization of 74:

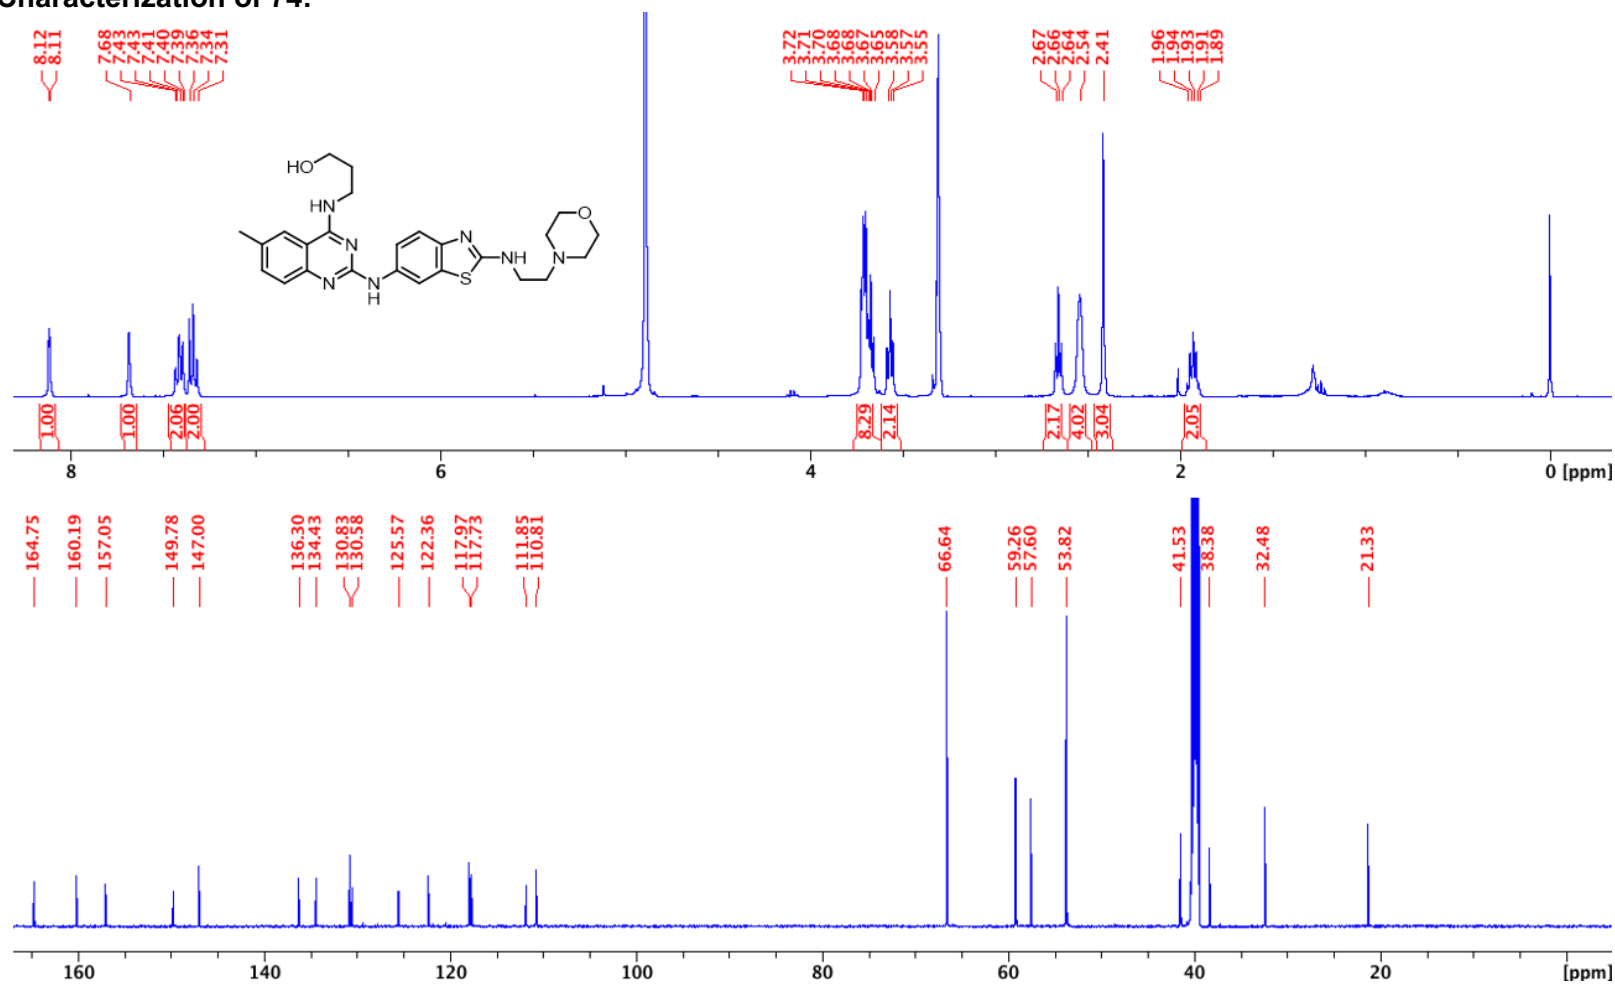

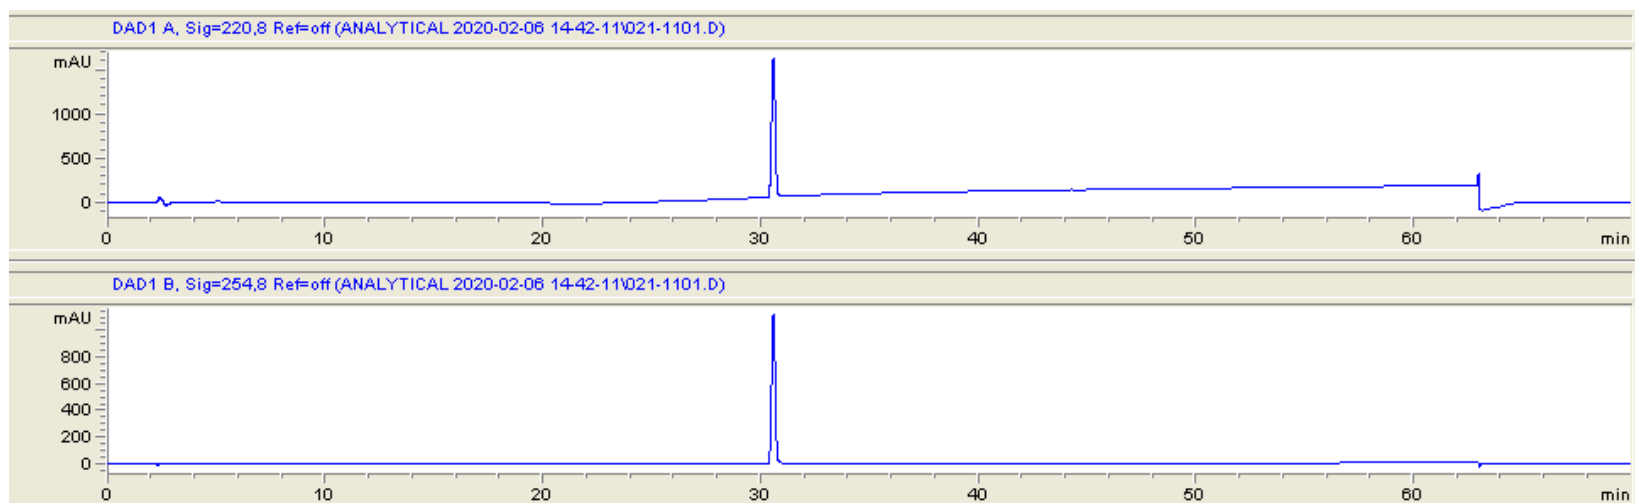

**Figure S10.**  $^1\text{H}$  NMR spectrum of compound **10** in  $\text{CDCl}_3$ . The chemical structure of compound **10** is shown in the top left. The NMR spectrum shows peaks at 7.83, 7.82, 7.61, 7.59, 7.50, 7.41, 7.35, 7.33, 7.33, 6.90, 6.89, 6.89, 6.87, 6.80, 6.78 ppm (aromatic region), 5.93 ppm (NH), 4.54 ppm (CH<sub>2</sub>), 3.76, 3.74, 3.72, 3.67, 3.65, 3.64 ppm (CH<sub>2</sub>), 2.46 ppm (CH<sub>3</sub>), 1.97, 1.95, 1.93, 1.90 ppm (CH<sub>2</sub>). Integration values are shown below the peaks: 0.99, 0.96, 1.00, 0.95, 0.94, 0.97, 2.04, 1.07, 1.99, 2.10, 2.05, 2.00, 3.02, 2.02.

CC1=CC=C2N=C(NC(=NC2=C1)Nc3ccc4sc(NCCOc5ccccc5)nc4)NC(=O)CCO

<sup>1</sup>H NMR spectrum (CDCl<sub>3</sub>) of compound 10. The spectrum shows peaks from 0 to 8 ppm. The chemical structure of compound 10 is shown in the top left. The structure is a quinazoline derivative with a 3-((benzyloxyamino)thio)phenyl group at position 4 and a 3-(2-hydroxyethyl)amino group at position 2. The NMR spectrum has the following peak data: 7.92, 7.66, 7.64, 7.53, 7.53, 7.47, 7.46, 7.44, 7.29, 7.29, 7.27, 7.25, 7.25, 6.97, 6.96, 6.96, 6.92, 6.92, 6.92, 6.92, 6.92, 6.92, 4.26, 4.23, 4.23, 3.91, 3.90, 3.89, 3.77, 3.76, 3.67, 3.64, 2.48, 1.97, 1.95, 1.93, 1.92, 1.90. Integration values are: 1.81, 0.97, 0.95, 1.88, 1.85, 2.82, 1.98, 1.92, 1.94, 2.02, 2.92, 2.00.

# Characterization of 77:

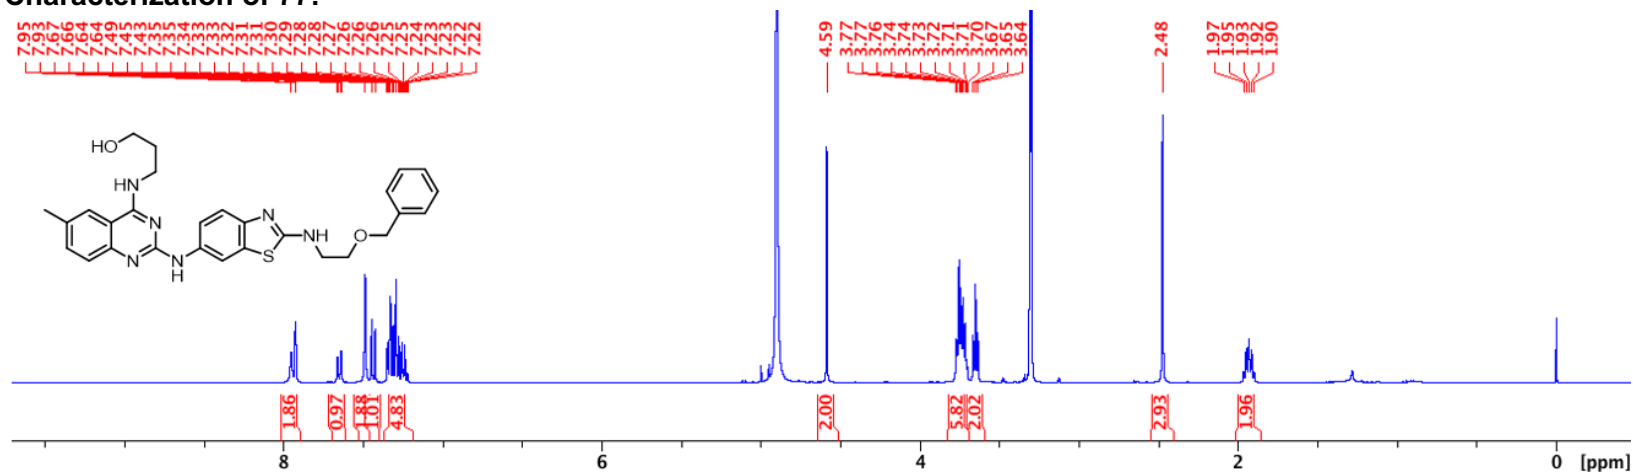

# Characterization of 78:

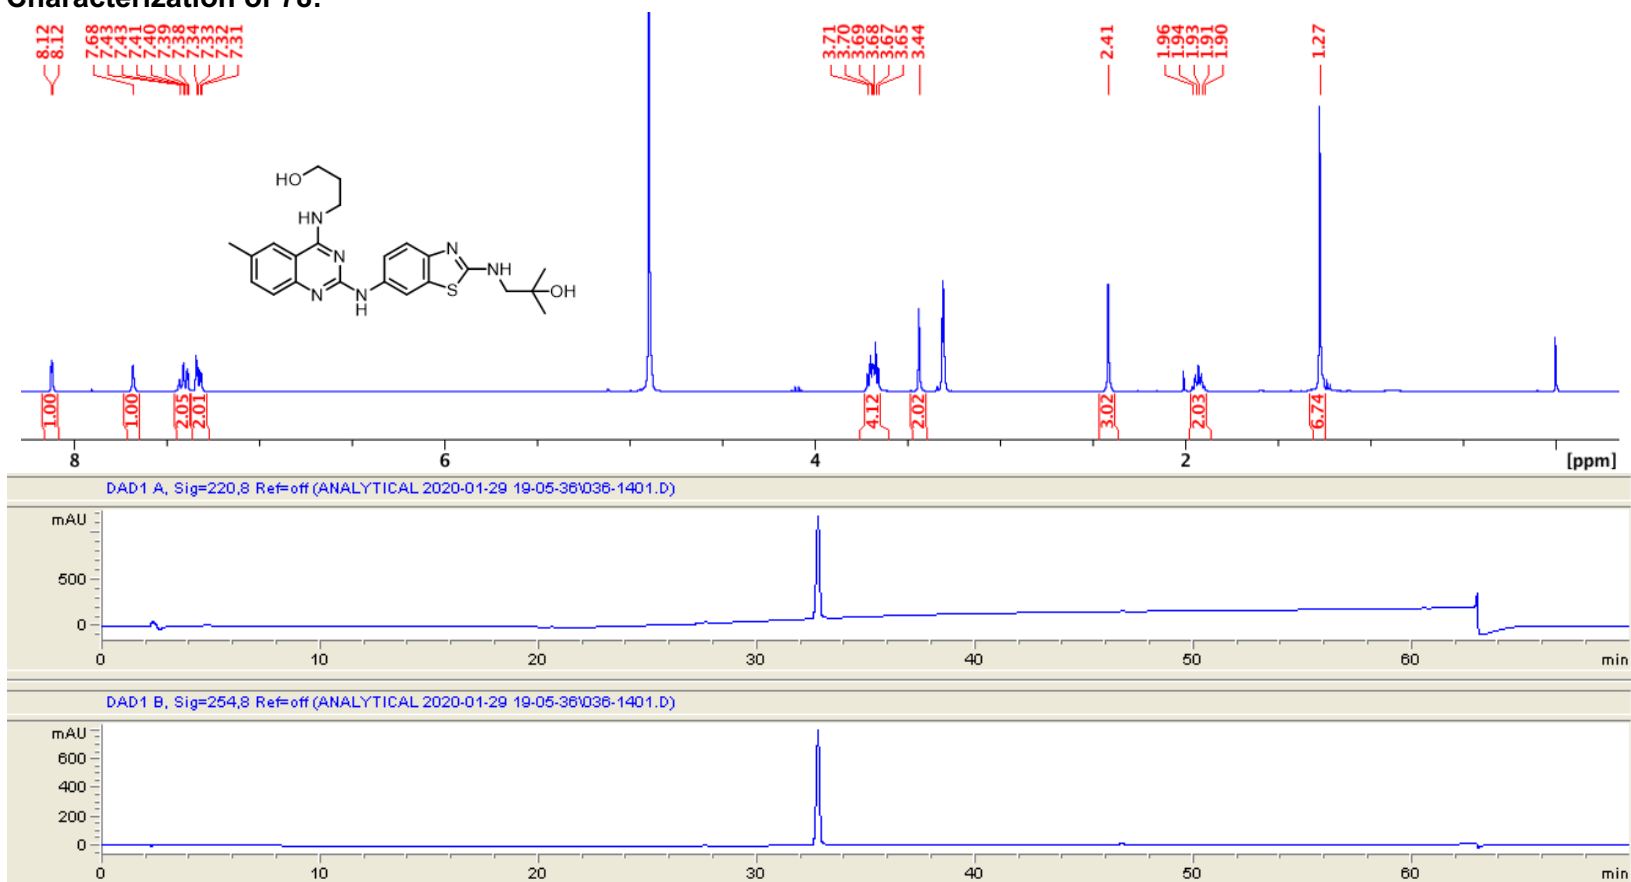

# Characterization of 79:

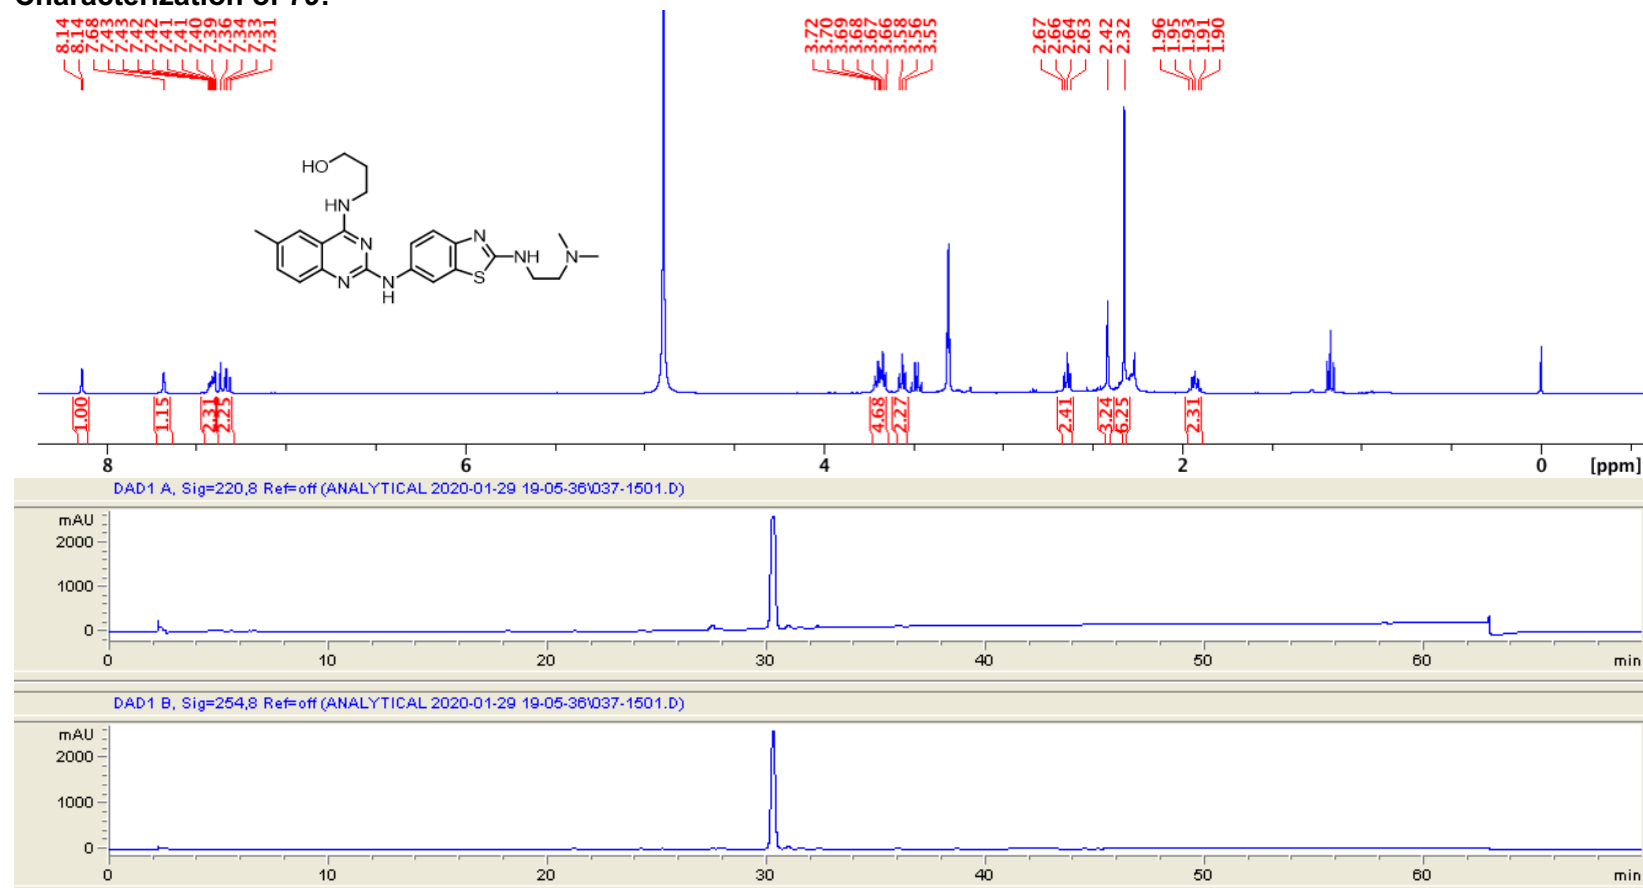

### Characterization of 80:

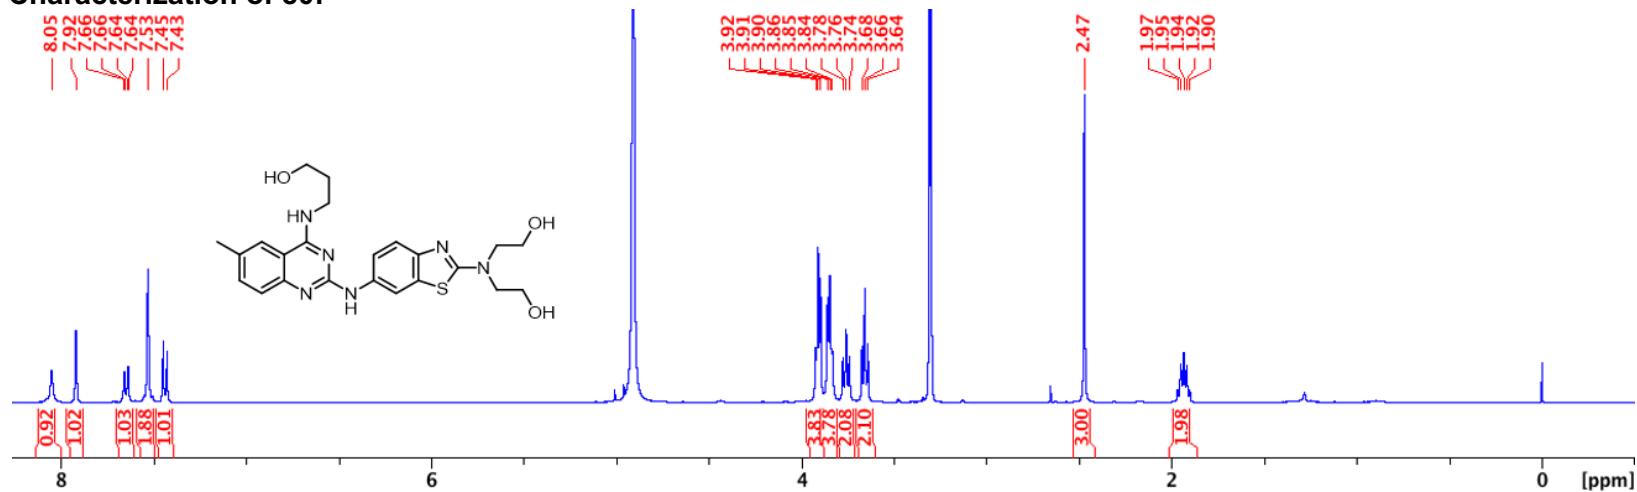

### Characterization of 81:

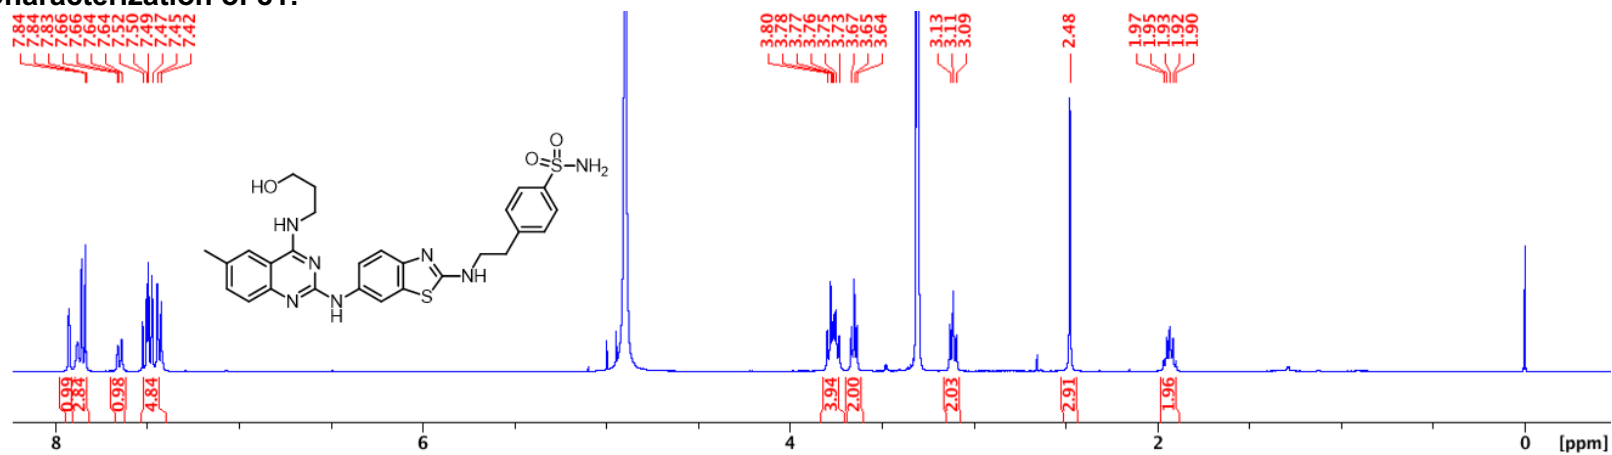

Characterization of 82:

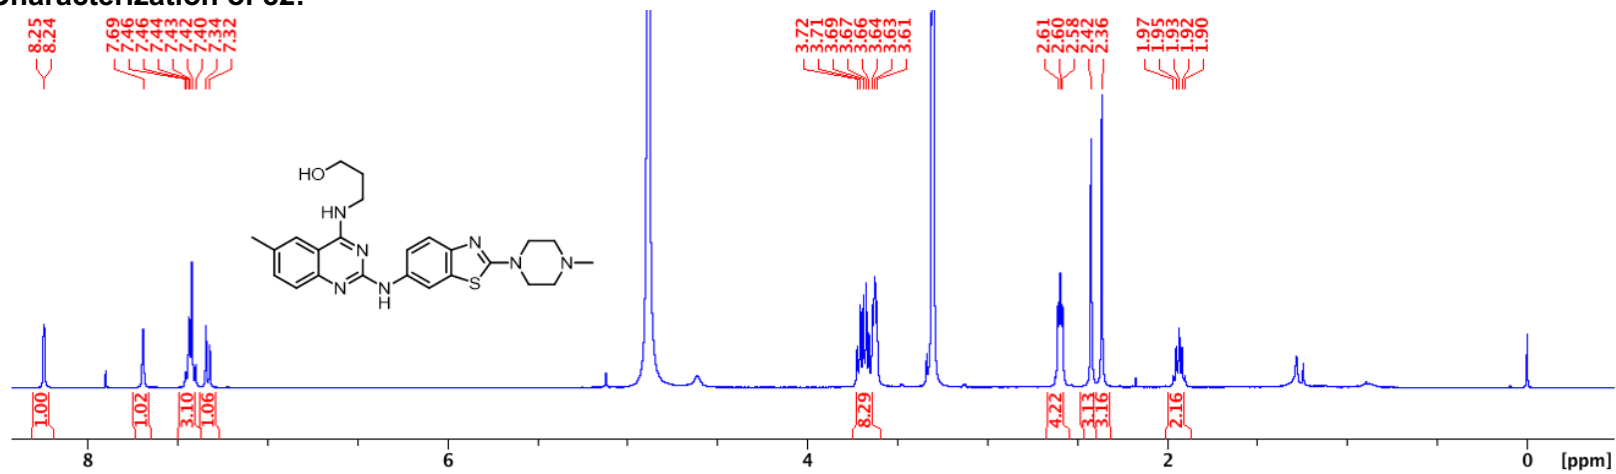

## REFERENCES

1. Chen, C. Z.; Sobczak, K.; Hoskins, J.; Southall, N.; Marugan, J. J.; Zheng, W.; Thornton, C. A.; Austin, C. P., Two high-throughput screening assays for aberrant RNA-protein interactions in myotonic dystrophy type 1. *Anal. Bioanal. Chem.* **2012**, 402 (5), 1889-98.
